1 **Protein turnover in the developing *Triticum aestivum* grain**

2

3 Hui Cao, Owen Duncan, A. Harvey Millar\*

4

5 ARC Centre of Excellence in Plant Energy Biology, University of Western Australia, Bayliss Building  
6 M316, Crawley, WA 6009, Australia

7 School of Molecular Science, University of Western Australia, Bayliss Building M316, Crawley, WA  
8 6009, Australia

9

10

11 \*Corresponding author: [harvey.millar@uwa.edu.au](mailto:harvey.millar@uwa.edu.au)

12

13

14

15

16

17

18

19

20

21

22

23

24

25

26

27

28

29

30 **Abstract**

31 Protein abundance in cereal grains is determined by the relative rates of protein synthesis and protein  
32 degradation during grain development. Through combining *in vivo* stable isotope labelling and in-  
33 depth quantitative proteomics, we have measured the turnover of 1400 different types of proteins  
34 during wheat grain development. We demonstrate that there is a spatiotemporal pattern to protein  
35 turnover rates which explain part of the variation in protein abundances that is not attributable to  
36 differences in wheat gene expression. We show that approximately 20% of total grain ATP production  
37 is used for grain proteome biogenesis and maintenance, and nearly half of this budget is invested  
38 exclusively in storage protein synthesis. We calculate that 25% of newly synthesized storage proteins  
39 are turned over during grain development rather than stored. This approach to measure protein  
40 turnover rates at proteome scale reveals how different functional categories of grain proteins  
41 accumulate, calculates the costs of protein turnover during wheat grain development and identifies  
42 the most and the least stable proteins in the developing wheat grain.

43

## 44 **Introduction**

45 Wheat (*Triticum aestivum* L.) is a trusted source of protein and calories for human consumption and  
46 serves as the staple food for 30% of the human population<sup>1</sup>. Although global wheat production  
47 continues to grow steadily, it is not sufficient to meet predicted demand, especially when the global  
48 population is projected to exceed 9 billion by 2050 requiring an increase of wheat production by about  
49 70%<sup>2,3</sup>. To cope with such a challenge, researchers, breeders and wheat-processing industries have  
50 been working collaboratively to enhance yield while still maintaining grain-quality attributes such as  
51 grain protein content<sup>4,5</sup>.

52 While wheat protein content is dominated by glutenin and gliadin storage proteins<sup>6</sup>, it also includes  
53 thousands of other components spread through the endosperm, embryo and pericarp<sup>7,8</sup>. The  
54 abundance of high and low molecular weight glutenins determine dough elasticity, while gliadins  
55 contribute to dough extensibility<sup>9</sup>. A complex pattern of expression of the protein synthesis apparatus  
56 and many different types of proteases occur during the early and later stages of grain development<sup>10-</sup>  
57 <sup>12</sup>. Further, wheat storage proteins are assembled, folded, aggregated and stabilised in the ER, and  
58 then follow a Golgi or ER route to vacuolar protein bodies<sup>13,14</sup>. As a consequence, the abundance of  
59 specific proteins products correlates poorly with expression of the encoding genes in both wheat<sup>15</sup>  
60 and many plants<sup>16,17</sup>. Identification and quantification of additional factors that contribute to  
61 individual protein abundances and changes in abundance profiles over time are needed to better  
62 control wheat grain protein composition.

63 One such factor is protein turnover rate that dictates how quickly new plant proteins are synthesized  
64 while unwanted or dysfunctional proteins are degraded and recycled<sup>18-20</sup>. Study of protein turnover  
65 rate in plants have focused on either model plants such as Arabidopsis or non-food tissues of crops,  
66 such as seedlings or leaves<sup>19,21-26</sup>. These non-food plant proteomes can be studied in steady-state  
67 conditions influenced only by dilution through tissue growth<sup>18</sup> and the relatively short lag period for  
68 introduction of stable isotopes makes calculating protein turnover measurements in these systems

69 feasible<sup>19,26</sup>. In comparison, studying grain filling is complicated by the complex dynamics of protein  
70 accumulation during development and the relative difficulty of rapidly introducing stable isotopes into  
71 the spike<sup>27</sup>.

72 Here, we have overcome these technical and biological challenges to establish *in vivo* stable isotope  
73 (<sup>15</sup>N) labelling to enable protein turnover rates to be measured during wheat grain development. Using  
74 this approach, we monitored synthesis and degradation rate of over 1400 different wheat protein  
75 types during grain filling and calculated the ATP energy usage for protein synthesis and degradation.  
76 Wheat grain protein turnover rates provide scientists and breeders with a quantitative and in-depth  
77 understanding of how each wheat grain protein accumulates and a biotechnological pathway to craft  
78 a lower cost grain proteome.

79

## 80 Results

81 **In vivo stable-isotope nitrogen ( $^{15}\text{N}$ ) labelling of wheat grain proteins.** Measuring the synthesis and  
82 degradation of individual wheat proteins requires the labelling of new proteins in grains. We  
83 undertook this labelling by incorporation of the stable isotope of nitrogen,  $^{15}\text{N}$ , into the amino acids  
84 used for their synthesis<sup>18,20</sup>. Wheat grain development includes cell division and expansion until 14  
85 days post anthesis (DPA), grain filling (14 to 28 DPA), and desiccation and maturation (28 to 42 DPA)<sup>28</sup>.  
86 To determine when during development the turnover rate of wheat grain proteins could be measured,  
87 four sets of wheat plants were raised in hydroponic medium with N salts of natural isotope abundance  
88 (99.6%  $^{14}\text{N}$ , 0.4%  $^{15}\text{N}$ ) until plants reached 7, 14, 21 and 28DPA, respectively. The growth media of  
89 natural N isotopes was then replaced by heavy  $^{15}\text{N}$  labelled media (2%  $^{14}\text{N}$ , 98%  $^{15}\text{N}$ ). Grain samples  
90 were harvested after 7 days of continuous labelling (Extended Data Fig. 1a). Peptide mass  
91 spectrometry analysis showed that nearly 25% of N atoms in newly synthesised proteins in wheat  
92 grain were  $^{15}\text{N}$  after the 7-day labelling period, regardless of the grain DPA (Extended Data Fig. 1b).  
93 Broadly, calculations of the labelled protein fraction can be made independently of the % of  $^{15}\text{N}$  they  
94 contain, making this technique robust to differences in  $^{15}\text{N}$  incorporation rate<sup>18-20</sup>. We found younger  
95 grains showed a higher proportion of newly synthesised proteins in their total protein pool (labelled  
96 protein fraction, LPF) than older grains (Extended Data Fig. 1c). However, we know that at least 20%  
97 of  $^{15}\text{N}$  incorporation is required to make high-quality protein turnover rates measurements with FDR  
98 < 1%<sup>26</sup>, we worked to achieve this basal rate by focusing on 7DPA-old grain as our first time point for  
99 subsequent labelling experiments. To capture the major events of grain development, samples of  
100 progressively labelled grain were collected after 3, 7 and 10 days of continuous  $^{15}\text{N}$  labelling to span  
101 the 7DPA to 17DPA period (Extended Data Fig. 2a). A significant expansion was seen in grain size over  
102 this time period with single grain fresh weight tripling over 10 days from 25 mg at 7DPA to 78 mg at  
103 17DPA (Fig. 1a, b). The  $^{15}\text{N}$  enrichment level gradually increased over time from 20% after 3 days  
104 (10DPA) to 29% after 10 days (17DPA) (Fig. 1c).

105 **One day lag time in labelling of wheat grain proteins.** Incorporation of nitrogen into the developing  
106 grain requires long-distance transport from the roots through the phloem, before its assimilation, use  
107 and storage in leaves and the spike<sup>29</sup>. Using a logarithmic regression model and our 3, 7 and 10 day  
108 labelling data, we calculated a lag of 28 hours (Extended Data Fig. 3a). To confirm this lag time  
109 estimated, we used both GC-MS analysis of free amino acids and LC-MS analysis of peptides to assess  
110 the ratio of heavy (+1) to mono abundance of amino acids and peptides in samples collected in the  
111 first 30 hours of labelling. We found both amino acids and peptides of proteins remained at their  
112 natural abundance level before 24 h but rapidly rose between 24-30 h following <sup>15</sup>N labelling  
113 (Extended Data Fig. 3b, c).

114 **Grain respiration rate and ATP production.** Protein production is a major user of cytosolic ATP  
115 generated through oxidative phosphorylation. Using a fluorophore-based oxygen sensor, we  
116 measured the grain respiration rate during grain development and found younger grains respired at  
117 twice the rate of older ones on a fresh weight basis (Fig. 1d). As cellular respiration is the primary ATP  
118 production source in wheat grain, and assuming a cellular ATP production ratio of 1 O<sub>2</sub> to 4.5 ATP<sup>19</sup>,  
119 the total ATP production rate of a single grain was calculated to be 37, 60, 54 and 54 μmol ATP per  
120 day for grains at 7, 10, 14 and 17DPA, respectively (Supplementary Data 1d).

121 **Calculating individual fold changes in protein abundance for proteins during wheat grain**  
122 **development.** As the proteome of the wheat grain is not in a steady-state during filling, we needed to  
123 obtain individual fold changes in protein abundance (FCP) values for each protein of the wheat grain.  
124 To do this a spike-in procedure was developed that involved adding a standard amount of a fully <sup>15</sup>N  
125 labelled wheat grain standard (see methods) to four grains from each time point. This helps to define  
126 proteins rapidly accumulating in the grain and exclude the effect of differential starch accumulation  
127 on the measurements (Extended Data Fig. 2b). Using this approach, quantification of the abundance  
128 change of 2307 non-redundant grain proteins were measured using data from over 71,000  
129 independently quantified peptides (Supplementary Data 4a). Principal component analysis of the

130 quantitative data set showed that grain samples separated according to their DPA with the first  
131 principal component explaining nearly 94% of the variation. Only minor variation was observed in the  
132 second principal component and biological replicate samples of the same time point were closely  
133 clustered together (Extended Data Fig. 5a). Over half of the identified proteins increased in abundance  
134  $\geq 2$ -fold from 7DPA to 17DPA, with a few exceptions that showed the opposite pattern, consistent  
135 with net protein accumulation during grain development (Fig. 2a). Quantitative abundance changes  
136 for different proteins during grain development varied from 0.018-fold to 126-fold. Examples shown  
137 in Fig 2b illustrate the dynamics of different protein groups such as ribosomal proteins (fold change <  
138 3 over 10 days) and storage proteins (fold change > 25 on average and up to 126 over 10 days).

139 MapMan functional category bins<sup>30</sup> were used to separate identified proteins into 34 groups ( $\geq 10$   
140 proteins in each). These showed a median fold change value of 1.38-, 2.31- and 2.45 at 10, 14 and  
141 17DPA compared to 7DPA (Fig. 2c and Extended Data Fig. 6). Exceptions were found in the categories  
142 of storage proteins, major CHO metabolism and stress response, where fold change values  
143 significantly higher than the median were observed. These data are consistent with biogenesis and  
144 accumulation of starch and storage proteins being major events during grain development and  
145 moisture loss in ripening and maturation being a post-anthesis stress<sup>31</sup>. Protein categories associated  
146 with protein folding, TCA cycle, DNA synthesis and photosynthesis showed lower fold change than the  
147 median, likely because they were less active cellular pathways during grain development. Together  
148 this evidence showed clear temporal patterns in the regulation of protein abundance during grain  
149 development.

150 **Calculating wheat grain protein synthesis and degradation rates during grain development.** The  
151 labelled protein fraction (LPF) is an instantaneous measurement of the ratio between existing and new  
152 protein molecules for each individual proteins of interest at a given point of time. This information is  
153 derived from the ratio of peptides for a protein with greater than natural abundance (labelled) to the  
154 sum of peptides with natural abundance and greater than natural abundance [ $^{15}\text{N}/(^{14}\text{N} + ^{15}\text{N})$ ]. These

155 measurements are derived from quantitation of the deviation of the isotopic envelope from what  
156 would be expected of natural abundance peptides of a particular sequence<sup>19,32</sup>. LC-MS/MS results  
157 from 252 fractionated samples, including 108 fractions of progressive labelling samples and 144  
158 fractions of unlabelled samples, provided data on over 44,000 quantified peptides. Combining the  
159 information from peptides derived from the same protein allowed us to measure the LPF of 1711 non-  
160 redundant proteins from wheat grains. The median of the relative standard deviation from the mean  
161 (RSD) for each protein at a given time point was less than 11% across all three time points  
162 (Supplementary Data 5a). Spearman correlation coefficient analysis showed a relatively high  
163 correlation of LPF between biological replicates ranging from 0.81 to 0.95 (Extended Data Fig. 5g). PCA  
164 analysis suggested that up to 97% of the variation observed could be explained by the first principal  
165 component alone (Extended Data Fig. 5d). Through combining the individual fold change in protein  
166 (FCP) and LPF values for specific proteins, we then calculated protein synthesis rates and degradation  
167 rates for 1447 non-redundant proteins (Supplementary Data 5b). Relative protein synthesis rates ( $K_s/A$ ;  
168 where  $K_s$  is the synthesis rate constant, and  $A$  the abundance of protein) varied nearly 100 fold; ranging  
169 from  $0.057 \text{ d}^{-1}$  to  $5.27 \text{ d}^{-1}$  with a median of  $0.35 \text{ d}^{-1}$ . By contrast, protein degradation rates ( $K_D$ ; where  
170  $K_D$  is the degradation rate constant) had a median of  $0.11 \text{ d}^{-1}$  and ranged from effectively zero up to  
171  $0.94 \text{ d}^{-1}$ . The latter indicates a range of proteins in grain with half-lives of less than one day.

172 To determine if subcellular location influenced protein turnover rates in wheat grain, we grouped the  
173 data set by their subcellular location retrieved from a database of crop proteins with annotated  
174 locations; cropPAL<sup>33</sup>. We reassigned storage proteins into vacuole because once assembled in ER,  
175 storage proteins are transported to storage protein vacuoles (PSV)<sup>34</sup>. Based on this, vacuole proteins,  
176 predominantly storage proteins, showed higher median synthesis and degradation rates than other  
177 subcellular structures. The same pattern was found in subcellular protein sets of the peroxisome, Golgi  
178 apparatus and extracellular secreted proteins (Et), but the opposite pattern was seen in protein sets  
179 located in the mitochondrion, cytosol, plastid and the endoplasmic reticulum (ER) (Fig. 3a). These  
180 observations generally agreed with published data from Arabidopsis leaves which showed organellar



181 proteins that are physically separated from the cytosolic proteolysis system have relatively lower  
182 degradation rate, while cellular structures such as the Golgi apparatus have a frequently updated  
183 protein complement and a relatively higher turnover rate<sup>19</sup>.

184 When the data were arranged by MapMan functional category bins, most of the 37 major groups  
185 maintained a median  $K_S/A$  of  $0.35 \pm 0.15 \text{ d}^{-1}$  and median  $K_D$  of  $0.11 \pm 0.05 \text{ d}^{-1}$  (Fig. 3b). However,  
186 exceptions were found, notably stable photosynthesis proteins had a median  $K_S/A$  of  $0.24 \text{ d}^{-1}$  and  
187 median  $K_D$  of only  $0.03 \text{ d}^{-1}$ , while storage proteins had a median  $K_S/A$  of  $2.17 \text{ d}^{-1}$  and median  $K_D$  of  $0.48$   
188  $\text{d}^{-1}$ , indicating rapid synthesis and degradation cycling of a portion of storage proteins in developing  
189 grains. Variation of protein turnover rates was also observed for proteins located in the same  
190 organelle or subcellular structure but which belonged to different functional categories, or vice versa,  
191 such as cytosolic proteins involved in ATP synthesis, protein folding and protein synthesis, or RNA  
192 regulation factors located in the cytosol and nucleus (Fig. 3b). To better understand the connection  
193 between protein functional roles and their turnover rates, we compared turnover rate profiles  
194 between three sets of rapidly-cycling proteins and three more stable house-keeping protein sets. The  
195  $K_S/A$  of the rapidly-cycling proteins gradually increased or stayed steady over development, while a  
196 much lower synthesis rate and decreasing  $K_S/A$  over development was observed for more stable  
197 house-keeping functional categories (Fig. 3c). As expected, much lower  $K_D$  was determined for house-  
198 keeping proteins in comparison with rapidly-cycling proteins, but unlike protein synthesis rate, both  
199 protein types shared a similar pattern over development, notably that  $K_D$  dropped from its peak at  
200 10DPA to its lowest level at 14DPA followed by a slight increase by 17DPA.

201 Storage proteins were prominent members of lists of the 20 most rapidly synthesized proteins (55%)  
202 and the 20 most rapidly degraded proteins (30%) in wheat grains; this included gliadins, globulins,  
203 high-molecular-weight glutenin subunits (HMW-GS) and low-molecular-weight glutenin subunits  
204 (LMW-GS) (Extended Data Table 1). Proteins annotated as responding to stress conditions were the  
205 second most numerous in both lists; 4 were on the 20 most rapidly synthesized list and 3 were on the

206 most rapidly degraded list. An alpha-amylase inhibitor (TraesCS6D01G000200.1) topped the  
207 degradation rate list and had a calculated half-life of only 0.74 d<sup>-1</sup>.

208 To facilitate further comparisons, we used filters to select a set of 149 wheat proteins that were  
209 synthesized rapidly ( $K_S/A \geq 2 \cdot \text{median } K_S/A$  of 0.71 d<sup>-1</sup>) and a set of 67 proteins that were synthesized  
210 slowly ( $K_S/A \leq 0.5 \cdot \text{median } K_S/A$  of 0.18 d<sup>-1</sup>). These two groups represented roughly 10% and 5% of all  
211 measured proteins, respectively (Supplementary Data 5b). Adopting the same filtering principles, 291  
212 (~20%) and 320 (~22%) proteins were selected as rapidly and slowly degrading proteins, respectively.  
213 These groups were then further clustered as being house-keeping proteins (ie. both slow  $K_S/A$  and  $K_D$ ,  
214 SS), induced but stable proteins (i.e. fast  $K_S/A$  and slow  $K_D$ , FS), and rapidly-cycling proteins (ie. both  
215 fast  $K_S/A$  and  $K_D$ , FF) (Extended Data Fig. 7a). Functional category analysis of these sets showed that  
216 the house-keeping proteins mainly participated in photosynthesis, DNA synthesis and glycolysis; while  
217 induced but stable proteins participated in major CHO metabolism, transport and amino acid synthesis  
218 proteins; and the rapidly-cycling protein set was dominated by storage proteins, proteins involved in  
219 stress response and proteins involved in protein degradation (Extended Data Fig. 7b-d).

220 **Protein turnover rates explain varying abundance of proteins in different parts of the grain.** To find  
221 connections between protein turnover rates and the spatiotemporal abundance patterns of grain  
222 proteins, we separately quantified the abundance of 5550 grain protein groups in endosperm, embryo  
223 and pericarp (Extended Data Fig. 8 and Supplementary Data 6). These proteins were then assigned  
224 into seven categories based on their protein abundance profile using the definition and equations  
225 explained in the Methods section. Forty percent of these proteins were found evenly balanced in their  
226 abundance across grain tissues, ~32% were assigned as tissue-specific proteins (7% for endosperm,  
227 and 12.5% for embryo and pericarp, respectively) and ~29% as tissue-suppressed proteins, i.e.  
228 proteins present two tissues but low in the third (14% for endosperm, and 7.5% for embryo and  
229 pericarp, respectively) (Fig. 4a). The endosperm-specific proteins (Fig. 4c) had high fold changes and  
230 increasing net accumulation rate over development, while pericarp-specific proteins (Fig. 4c) had low

231 fold change in abundance and decreasing in net accumulation rate over time. In comparison, embryo-  
232 specific proteins had an increasing net accumulation rate over development but very low turnover  
233 rates and fold change in abundance values (Fig. 4c). The proteins with tissue-balanced profiles,  
234 showed moderate fold changes and net accumulation rates remained stable over development (Fig.  
235 4c). This pattern was also observed to a lesser extent in protein groups suppressed in a specific tissue  
236 (Extended Data Fig. 9).

237 **ATP Energy budget for wheat grain proteome synthesis and maintenance.** The ATP energy cost for  
238 both synthesis and degradation of 1140 proteins in the wheat grain proteome was calculated through  
239 combining Intensity Based Absolute Quantification (iBAQ) values (Supplementary Data 7a), protein  
240 turnover rates, amino acid length, and the ATP cost per amino acid residue for protein synthesis and  
241 protein degradation<sup>35-37</sup> (Supplementary Data 7b). This revealed that during grain development, each  
242 grain invested 20% of its total ATP production on protein biogenesis and maintenance. The ATP budget  
243 for protein synthesis ( $9.8 \mu\text{mol grain}^{-1} \text{d}^{-1}$ ) was nearly 9 times larger than for protein degradation ( $1.2$   
244  $\mu\text{mol grain}^{-1} \text{d}^{-1}$ ; Fig. 5a).

245 Grouping the ATP usage data by the subcellular location of each protein allowed us to assess the  
246 relative energy cost of maintaining different subcellular structures in the wheat grain. Maintaining the  
247 proteins of the vacuole (the destined location of storage proteins) used one third of the total ATP  
248 budget for protein synthesis although this group only contained 24 unique groups of proteins. This  
249 was followed by the largest category, cytosolic proteins (comprising 469 protein groups), that cost  
250 ~25% of the ATP, and the plastid and Golgi apparatus each cost ~13% of the ATP used for protein  
251 synthesis (Fig. 5b). The cytosol proteome cost 34% of the total ATP for protein degradation, which was  
252 nearly twice that of the vacuole (17.8%). Expressing the ATP usage rate as nmol per million protein  
253 copies per grain per day ( $\text{nmol ATP mcopy}^{-1} \text{grain}^{-1} \text{d}^{-1}$ ), the vacuole proteome was the most expensive  
254 for protein synthesis on a location basis, costing  $144 \text{ nmol ATP mcopy}^{-1} \text{grain}^{-1} \text{d}^{-1}$ , which was 15 times  
255 higher than the lowest cost compartment, the nucleus, at only  $9.3 \text{ nmol ATP mcopy}^{-1} \text{grain}^{-1} \text{d}^{-1}$ .

256 Peroxisomes topped the list of protein degradation energy costs, consuming 12 nmol ATP mcopy<sup>-1</sup>  
257 grain<sup>-1</sup> d<sup>-1</sup>, while the cytosol, by contrast, only consumed 2.2 nmol ATP mcopy<sup>-1</sup> grain<sup>-1</sup> d<sup>-1</sup> for this  
258 purpose.

259 When the data was grouped by functional category, we observed that storage proteins and enzymes  
260 of major CHO metabolism were the most costly in terms of both protein synthesis and degradation,  
261 together they used half the energy budget of total protein synthesis and a quarter of the total energy  
262 budget for protein degradation (Fig. 5c). Storage proteins were the most expensive functional  
263 category in terms of synthesis and maintenance of proteins, costing 152 nmol ATP mcopy<sup>-1</sup> grain<sup>-1</sup> d<sup>-1</sup>  
264 for synthesis and additional 9 nmol ATP mcopy<sup>-1</sup> grain<sup>-1</sup> d<sup>-1</sup> for degradation. Less costly protein  
265 synthesis and maintenance expense was evident for ribosomal proteins (7 nmol ATP mcopy<sup>-1</sup> grain<sup>-1</sup>  
266 d<sup>-1</sup> for synthesis and 0.9 nmol ATP mcopy<sup>-1</sup> grain<sup>-1</sup> d<sup>-1</sup> for degradation). As expected, the 20 highest  
267 cost proteins were predominately storage proteins and major CHO metabolism proteins, among which  
268 the highest energy cost for an individual protein was an 11S globulin (TraesCS1A01G066100.1) that  
269 cost nearly 2% of grain ATP in its production during this stage of grain development (Extended Data  
270 Table 2).

271 Collectively, storage proteins dominated the wheat grain proteome in terms of abundance, fold  
272 change in protein, protein turnover rates and ATP energy usage; but this prominence builds over time.  
273 The grain invested only 10% of its total ATP energy budget for protein synthesis on the formation of  
274 storage proteins at the early grain filling stage (10DPA), but this subsequently grew 4.5 times in the  
275 next 4 days, reaching 45% of the total ATP budget for protein synthesis by 14 DPA, and settled at 36%  
276 by 17DPA (Fig. 5d). The ATP energy budget for degradation of storage proteins showed a similar  
277 pattern, increasing at the early stage of grain filling and decreasing at later stages, although it  
278 remained at a relatively high level over time. The machinery of major CHO metabolism, which is  
279 needed for starch synthesis, showed a rather stable energy usage over time compared to storage  
280 proteins. Likewise, proteins in functional categories such as photosynthesis, DNA synthesis and

281 glycolysis showed a relatively stable energy usage over time and only consumed a minor proportion  
282 of ATP production in the grain (Fig. 5d).

283 **Wheat storage proteins accumulation during grain filling.** To illustrate the complexity of  
284 accumulation patterns of members of the seven key storage protein families and their causes from  
285 7DPA to 17DPA we integrated 6 different measures into a single radar graphic (Fig. 6a). Our findings  
286 indicated that except for globulin 1 encoding genes which peaked at 30DPA, the mRNA of key storage  
287 proteins were most abundant at the early grain filling stage and were temporally offset from protein  
288 accumulation. A common pattern in synthesis rates and biogenesis energy cost (CostSyn) was shared  
289 between storage protein families; they reached the highest level at 14DPA and remained at this level  
290 until at least 17DPA. In comparison, significantly higher degradation rates and energy consumption  
291 were measured at the pre-grain filling stage (10DPA) than the grain filling stage (from 14DPA).  
292 Collectively these features resulted in a rapid accumulation in storage protein abundance, which  
293 increased over 20-fold on average and up to 90-fold for some storage protein isoforms from 10DPA  
294 to 17DPA (Fig. 6b).

295

## 296 **Discussion**

297 In this study, we provide an extensive and quantitative understanding of how different wheat grain  
298 proteins accumulate during grain development. The resulting protein turnover data allows the costs  
299 of individual proteins, protein functional groups, and cell structures during grain development to be  
300 calculated, providing an innovative foundation for grain protein engineering strategies.

301 Previous studies calculated a lag time of 8 h for <sup>15</sup>N labelling of proteins in hydroponically growth  
302 barley leaves<sup>26</sup> and 5 h in Arabidopsis young leaves<sup>19</sup>, but the lag involved in long-distance transport  
303 from roots to the wheat spike is likely to be considerably longer<sup>29</sup>. Furthermore, most protein turnover  
304 studies in plants to date have assessed steady-state scenarios where there is little or no

305 developmental change in protein composition<sup>19,26,38</sup>, which is not the case in grain filling. We solved  
306 these two problems by experimentally calculating a 28 h lag time for <sup>15</sup>N incorporation (Extended Data  
307 Fig. 3) and measuring the fold change in abundance for each protein of interest during grain  
308 development using a spike-in of a fully <sup>15</sup>N labelled proteome (Fig. 2 and Extended Data Fig. 6). This  
309 has allowed not only the protein turnover rates of over a thousand proteins to be determined, but to  
310 do so in a background of proteins changing in relative abundance over a 0.018-fold to 126-fold range.

311 As autotrophs, plants have access to a large source of ATP via photosynthesis in source leaves.  
312 However, the ATP yielded by this process is largely invested in sucrose synthesis that is transported to  
313 sink tissues, which leaves oxidative phosphorylation by respiration as the primary source for cytosolic  
314 ATP-dependent processes like protein synthesis and degradation<sup>19,39</sup>. Based on this we calculated the  
315 proportional energy cost for synthesis and degradation of the wheat grain proteome during grain  
316 filling based on grain respiration rates (Fig. 5). Our data show that approximately 20% of total grain  
317 ATP production through respiration is used for grain proteome biogenesis and maintenance, and  
318 nearly half of this budget is invested exclusively in storage protein synthesis. This proportion was  
319 similar in size to reports of the cost of Arabidopsis leaf protein turnover which varied from 16-42% of  
320 total ATP depending on the age of the examined leaf<sup>19</sup>. However, in grains this ATP investment is co-  
321 commitment with the high ATP demand of starch synthesis at the same times during development<sup>40,41</sup>.

322 Collectively, ATP provision to protein synthesis and degradation and the starch synthesis represent an  
323 energy constraint that will dictate the relative investment in starch and protein in the final grain.

324 Dough rheological properties and bread-making quality in wheat are primarily determined by gluten  
325 quantity<sup>9</sup>. In our development analysis, four storage protein families that are key components of  
326 gluten polymers, namely HMW-GS, LMW-GS, gliadin-like avenin and gamma-gliadin, represent 85% of  
327 storage protein abundance (Fig 6c and Supplementary Data 8); consistent with previous studies  
328 reporting 80-90% of total grain protein is gluten polymers<sup>6,42</sup>. Extensive previous studies have also  
329 demonstrated that gluten quality, both the ratio of gliadin/glutenin and the ratio of HMW-GS/LMW-

330 GS, strongly influences dough viscosity and elasticity, thus governing bread-making quality traits<sup>43-45</sup>.

331 The ratio of HMW-GS/LMW-GS is typically ~0.67 in mature grains<sup>42</sup>, our data show HMW-GS/LMW-GS

332 continuously decreased overtime from 3.66 at 10DPA to 1.63 by 14DPA and ending up 1.16 by 17DPA.

333 Unlike the ratio of HMW-GS/LMW-GS, the ratio of gliadin/glutenin remained stable during grain

334 development in our hands (Supplementary Data 8). Protein turnover data reveals that 25% of these

335 newly synthesized storage proteins appear to be turning over during grain development rather than

336 being stored and that instability of storage proteins was most prominent early in grain development

337 between 10 and 17 DPA. Wheat storage proteins are generally assembled, folded and aggregated in

338 the endoplasmic reticulum (ER), followed by a trafficking event mediated by protein bodies to

339 vacuoles for storage through either a Golgi-vacuole route or the ER-vacuole route<sup>13,14</sup>. Previous

340 evidence has suggested that storage proteins are stabilized during the processing within the ER due

341 to the formation of complex polymers through disulphide and noncovalent bonds (inter- and/or intra-

342 chain bonds)<sup>14,46</sup>. Dominguez and Cejudo showed that extractable wheat grain endoprotease activity

343 reached its maximum at 15 DPA and then decreased afterwards<sup>10</sup>. Likewise, Nadaud et al showed grain

344 proteolysis activity peaked at approximately 10DPA, and showed a decrease pattern over the

345 following 4 days<sup>11</sup>. Our data also indicate a significant decrease in protein degradation machinery of

346 the endomembrane system from 10DPA to 17DPA (Supplementary Data 7c). These high degradation

347 rates of storage proteins detected at 10DPA are not the case for all storage protein isoforms (Fig. 6b

348 and Supplementary Data 7c), providing a breeding or biotechnological pathway to select for lower

349 cost storage proteins with lower degradation rates.

350 Extensive effort has been placed into assessing the correlation between transcript level and protein

351 abundance, however only ~40% of the variation in protein abundance is typically explained by

352 transcript data in eukaryotes, including plants<sup>16,17,47,48</sup>. In wheat there is only a 32% concordance

353 between protein and transcript expression profiles observed during grain development<sup>15</sup>. This atlas of

354 wheat grain protein turnover rates contributes to explaining the remaining variation in protein

355 abundance not correlated to transcript levels. As an atlas it shows that despite variation of turnover

356 rate for different proteins approaching 100 fold, protein turnover rates are highly correlated with their  
357 changing profiles of FCP over time when a net accumulation rate calculation is considered as the key  
358 driver of protein abundance alterations (Fig. 3 and Extended Data Fig. 10). It is also known that  
359 spatiotemporal regulatory mechanisms broadly exist in live-systems and play essential roles in protein  
360 abundance regulation to meet various biological scenarios<sup>19,49-51</sup>. This pattern is also evident in our  
361 wheat grain data and we show that the higher turnover rates of storage proteins when compared to  
362 other protein groups drives the preferential accumulation of storage proteins as one of the largest  
363 cellular events during grain filling (Fig. 2-4).

364 Overall this study provides a comprehensive and in-depth view of which key storage proteins  
365 accumulation during pre- and the early-mid grain filling stage. In addition, the quantitative data for  
366 non-storage proteins provides insights into a wide range of biological events during wheat grain  
367 development, such as the protein machinery for starch accumulation and the initiation of desiccation  
368 stress responses. Future studies will be needed to reveal why wheat grains partake in cycles of protein  
369 synthesis and degradation and find approaches to alter this cycling such as knockout of unstable  
370 storage proteins and expression of more stable versions using either conventional cross breeding  
371 approaches or gene editing technologies. Success in this pursuit could help increase grain protein  
372 content, improve energy use efficiency of protein production, and help meet the unprecedented food  
373 demand for sustainable plant-based protein production in modern agriculture.

## 374 **Methods**

375 **Plant materials and growth condition.** Wheat (*Triticum aestivum*) plants of cv. Wyalkatchem, were  
376 grown in an indoor chamber under 16/8-h light/dark conditions with 26/18°C, 60% humidity and light  
377 intensity of 800  $\mu\text{mol m}^{-2} \text{s}^{-1}$ . The hydroponic growth system used for plant growth is described by  
378 Munns and James<sup>52</sup>. Fifty litres Hoagland solution was used for 24 plants and changed weekly<sup>8</sup>. Seeds  
379 were vernalized under 4°C for 3 days before being transferred to the growth chamber followed by 3  
380 to 5 days germination until two leaves emerged at which point they were transferred to the



381 hydroponic growth system. Plants were firstly grown with natural abundance N medium, which was  
382 then replaced with  $^{15}\text{N}$  ( $^{15}\text{NH}_4^{15}\text{NO}_3$ , 98 %, Sigma fine chemicals) medium for a labelling programme  
383 when plants reached the required growth stage (eg. 7DPA). Plants were rinsed three times with  
384 distilled deionized water before being transferred to the  $^{15}\text{N}$  medium. A set of fully labelled plants to  
385 generate the spike-in standard samples were grown with  $^{15}\text{N}$  medium at all times after germination.  
386 Grain samples, including unlabelled, progressive labelled and fully labelled samples, were harvested  
387 at multiple time points as shown in Extended Data Fig. 1 and 2. Only 8 grains from the middle of the  
388 ear (both floret 1 and 2) were collected in each case. Grain tissues of embryo, endosperm and pericarp  
389 were hand-dissected by scalpel. Due to the challenge of separating embryo from endosperm in young  
390 grain, only 14 and 17DPA-old grain were used for dissection and tissue samples of two time points  
391 were pooled together. Samples were snap frozen in liquid nitrogen and stored in  $-80^\circ\text{C}$  for further  
392 protein extraction.

393 **Grain respiratory oxygen consumption rate measurement.** Respiration rates of single premature  
394 grain at different growth age (7, 10, 14, and 17DPA) were measured using a Q2 oxygen sensor (Astec-  
395 Global) in sealed 2 mL capacity tubes at  $24^\circ\text{C}$ . The  $\text{O}_2$  concentration within tubes were measured at an  
396 interval of 5 min for 16 h. In total, 64 replicates, including 8 biological replicates (from different plant)  
397 with 8 technical replicates (8 grains from the same ear), were performed for each growth stage. The  
398  $\text{O}_2$  consumption rate ( $R_N$ ) trace was generated using a moving slope of  $\text{O}_2$  consumption in a 2 h window  
399 and the formula reported by Scafaro et al in 2017<sup>53</sup>. The representative  $R_N$  was calculated using the  $\text{O}_2$   
400 consumption slope in the 2 h window from 1-3 h. Total ATP production of a single wheat grain at each  
401 growth stage was also estimated based on the ATP production rates of 1  $\text{O}_2$  to 4.5 ATP<sup>19</sup>.

402 **Spike-in approach for individual wheat grain FCP measurement.** To precisely measure individual FCP  
403 of wheat grain proteins during grain development, a spike-in approach was developed. Briefly, an  
404 equal number of  $^{15}\text{N}$  fully labelled grains (8 grains in this study) of each time points (7, 10, 14 and  
405 17DPA) were pooled together and ground using mortar and pestle under liquid nitrogen. The fully

406 labelled fine sample powder of 100 mg was spiked into four unlabelled grains at each time point as an  
407 internal standard, followed by another grinding (Extended Data Fig. 2b). These spike-in containing  
408 samples were store in -80°C for subsequent protein extraction, mass spectrometry data acquisition  
409 and FCP measurement.

410 **Sample preparation.** A chloroform/methanol extraction protocol<sup>54</sup> was applied for total protein  
411 extraction in this study. Briefly, 200 mg sample powder generated by extensive grinding in liquid N<sub>2</sub>  
412 was mixed with 400 µL extraction buffer (125 mM Tris-HCl pH 7.5, 7% (w/v) SDS, 0.5% (w/v) PVP40,  
413 Roche protease inhibitor cocktail (Roche, 1 tablet per 50 ml)) and rocked on ice for 10 min. After a  
414 centrifugation at 10,000 g for 5 min, about 200 µL supernatant was transferred into a new 2ml  
415 eppendorf tube, followed by protein precipitation through mixing the supernatant with 800 µL  
416 methanol, 200 µL chloroform and 500 µL distilled deionized water. The pellet was washed twice using  
417 methanol and then incubated with 90% (v/v) acetone at -20 °C twice for at least 1 hour each time.  
418 After drying at room temperature, protein pellet was resuspended using resuspension buffer (50 mM  
419 Ambic, 1% (w/v) SDS and 10 mM DTT). Protein concentration was quantified by an amido black  
420 method<sup>55</sup>.

421 Proteins (200 µg) were incubated with 20 mM DL-dithiothreitol for 20 min in darkness at room  
422 temperature, followed by a second incubation with 25 mM iodoacetamide for 30 min in darkness at  
423 room temperature. After diluting the SDS to its working concentration at 0.1% (w/v) via adding  
424 distilled deionized water, proteins were digested overnight using trypsin (Promega, Sequencing Grade  
425 Modified Trypsin, USA) at 37°C with protein-trypsin ratio of 50:1. The SDS removal and high-pH,  
426 reversed phase peptide fractionation for digested peptide solution<sup>56</sup> were conducted on an off-line  
427 HPLC (1200 series, Agilent Technologies) combining with two J4SDS-2 guard columns (PolyLC) and an  
428 XBridge™ C18 3.5 µm, 436 x 250 mm column (Waters). The pump flow was set at 0.5 ml/min using  
429 the following solution B (90% acetonitrile with 10 mM ammonium formate (pH 10/NH<sub>4</sub>OH) gradient:  
430 2 to 5% in 6 min, 5 to 35% in 60 min, 35 to 70% in 13 min, 70 to 100% in 10 min and 100 to 2% in 3

431 min. In total, 64 fractions for each sample were collected from 15 to 79 min in 1 min windows. The  
432 first 12 and last 4 fractions were discarded and the rest of the fractions in the same column of the 96  
433 well plate were combined together. The final 12 fractions of each sample were dried down through a  
434 vacuum centrifuge and store in -80°C for further mass spectrometry analysis.

435 **LC-MS data acquisition and processing.** Peptide fractions were resuspended with 25 µL of 5% (v/v)  
436 acetonitrile and 0.1% (v/v) formic acid in HPLC grade water followed by a filtering step using 0.22 µm  
437 centrifugal filters (Millipore). Purified peptide suspensions (2 µL each) were injected into a HPLC-chip  
438 (Polaris-HR-Chip-3C18, Agilent Technologies) through a capillary pump with a flow at 1.5 µL/min.  
439 Peptides were eluted from the C18 column online into an Agilent 6550 Q-TOF. Gradients were  
440 generated by a 1200 series nano pump (Agilent Technologies) with the nano flow at 300 nl/min, of  
441 which 5-35% (v/v) solution B (0.1% (v/v) formic acid in acetonitrile) in 35 min, 35-95% in 2min and 95-  
442 5% in 1 min. Parameters setting in MS acquisition was as described previously<sup>8</sup>. In total, LC-MS data  
443 of 516 fractions were successfully collected (Extended Data Fig. 2d). The primary MS data files are  
444 available via ProteomeXchange with identifier PXD022231.

445 To measure individual FCP of wheat grain proteins during grain development, LC-MS data stored in  
446 Agilent .d files of 288 fractions of spike-in and unlabelled samples (144 fractions each) were first  
447 converted to mzML files using the online Trans Proteomic Pipeline (TPP, v.5.2.0)<sup>57</sup>. The Comet search  
448 of above mzML files was conducted against protein database from IWGSC (v.1.0, 137029 sequence)<sup>58</sup>  
449 using decoy search, 20 ppm peptide mass tolerance and maximum 2 missed cleavage<sup>59</sup>. Further  
450 PeptideProphet search was performed for each replicate at each time point (eg. 12 fractions of  
451 replicate 1 of spike-in data at 7DPA and 12 fractions of replicate 1 of unlabelled data at 7DPA) and  
452 results were merged into single analysis file using PPM to accurate mass binning and decoy hits to pin  
453 down negative distributions. Protein identification and corresponding LPF for each protein were  
454 obtained by using an in-house pipeline written in R, of which 12 mzML files of spike-in data for each  
455 replicate were mapped back to its corresponding PeptideProphet file (.pep.xml file). Filters of

456 probability > 0.8, FDR < 3%,  $rsd \leq 25\%$  or  $sd \leq 25\%$  of overall mean LPF were applied for peptide list,  
457 while filters of probability > 0.95, FDR < 1%,  $rsd \leq 25\%$  or  $sd \leq 25\%$  of overall mean LPF, independent  
458 identifiers  $\geq 3$  across all samples, and total quantified peptides  $\geq 4$  were used in protein list. As LPF is  
459 the ratio of heavy nitrogen to total nitrogen  $H/(H+L)$ , the relative abundance for each protein in the  
460 ratio of heavy to light (H/L) was estimated by  $(1-LPF)/LPF$ . Individual FCP of each protein was calculated  
461 using the relative abundance at each time point dividing by its value at 7DPA. The same strategy as  
462 the FCP dataset with further  $LPF \geq 0.2$  was applied to progressive labelling dataset to obtain LPF values  
463 of each protein.

464 The LC-MS data of unfractionated 30-h labelling samples (Extended Data Fig. 2) were processed  
465 through Agilent MassHunter Workstation (v.10.1) to determine the ratio of heavy (+1) to mono  
466 abundance of peptides. Peptide peak area was used as peptide relative abundance.

467 **GC-MS data acquisition and processing.** Grain sample powder of 30 mg were mixed with 250  $\mu\text{L}$   
468 metabolite extraction buffer (85% (v/v) methanol, 15% (v/v) distilled deionized water, and  $0.1\text{mol L}^{-1}$   
469 sorbitol (D-Sorbitol- $^{13}\text{C}_6$ ) as the internal standard), and subsequently incubated on a thermomixer at  
470  $75^\circ\text{C}$  and 950 rpm for 10 min. After mixing with 125  $\mu\text{L}$  of chloroform and 250  $\mu\text{L}$  of distilled deionized  
471 water, sample solutions were centrifuged for 15 min at 2,000g, of which 50  $\mu\text{L}$  of supernatant was  
472 transferred to a new tube and dried out using a vacuum centrifuge. Sample derivatization started with  
473 an incubation in 20  $\mu\text{L}$  of  $20\text{ mg mL}^{-1}$  methoxyamine hydrochloride in pyridine for 2 h at  $37^\circ\text{C}$ , followed  
474 by a second incubation in 20  $\mu\text{L}$  of *N*-methyl-*N*-(trimethylsilyl)-trifluoroacetamide (SIGMA, USA) for 30  
475 min at  $37^\circ\text{C}$ . Incubations were conducted on a thermomixer at 950 rpm. Volume of 40  $\mu\text{L}$  derivatized  
476 sample was transferred to glass vials for GC-MS analysis. Metabolites samples of 1  $\mu\text{L}$  were injected  
477 into an Agilent 7890A gas chromatograph coupled with a Varian CP9013-Factor 4 column (40 m  $\times$  3  
478 0.25mm i.d.) and an Agilent 5975 quadrupole mass spectrum detector. GC-MS data acquisition was  
479 performed following descriptions reported by O'Leary and co-workers<sup>60</sup>. GC-MS data were processed  
480 and analysed using Agilent MassHunter Workstation (v.10.1) as mentioned earlier.

481 **Label free quantification using MaxQuant.** The same unlabelled LC-MS data of 144 fractions were  
482 processed by searching against IWGSC database through MaxQuant (v.1.6.1.0,  
483 <http://www.maxquant.org/>) with the iBAQ quantitation algorithm, 20 ppm peptide mass tolerance,  
484 maximum 2 missed cleavage and FDR < 1% for absolute protein copy number estimation<sup>61,62</sup>. Using  
485 the same parameter setup and LFQ search algorithm instead of iBAQ, the relative protein abundance  
486 of grain tissue samples (including endosperm, embryo and pericarp, 108 fractions in total) were also  
487 obtained. The reported protein lists were further filtered with  $rsd \leq 25\%$  or  $sd \leq 25\%$  of overall mean  
488 abundance, independent identifiers  $\geq 3$  across all samples, and total quantified peptides  $\geq 4$ . The  
489 protein contributions of each single of the three tissues to the total protein abundance were  
490 calculated using formulas as follows

$$491 \text{Contribution}_{(En)} = \frac{\text{Abun}(En)}{\text{Abun}(En) + \text{Abun}(Em) + \text{Abun}(Pe)} \quad \text{equation (1)}$$

$$492 \text{Contribution}_{(Em)} = \frac{\text{Abun}(Em)}{\text{Abun}(En) + \text{Abun}(Em) + \text{Abun}(Pe)} \quad \text{equation (2)}$$

$$493 \text{Contribution}_{(Pe)} = \frac{\text{Abun}(Pe)}{\text{Abun}(En) + \text{Abun}(Em) + \text{Abun}(Pe)} \quad \text{equation (3)}$$

494 Where En, Em and Pe represent endosperm, embryo and pericarp, and Abun represents the protein  
495 relative abundance. Proteins with a relative contribution  $\geq 66\%$  in one tissue and  $\geq 3$ -fold that in the  
496 other two tissues are defined as tissue-specific proteins (shown close to triangle vertices), while non  
497 tissue-specific proteins with a relative contribution  $\leq 17\%$  of a tissue are defined as tissue-suppressed  
498 proteins. The remaining proteins are found relatively evenly balanced across grain tissues. Protein  
499 category definition was further confirmed by the independent Tau method<sup>63</sup> (Extended Data Fig. 8c).  
500 Ternary diagram visualization was performed using the ggtern R package<sup>64</sup>.

501 **Protein turnover rates and ATP energy cost calculation.** Protein synthesis rates and degradation rates  
502 were calculated using formulas as follows

$$503 K_D = -\frac{\ln FCP \cdot (1-LPF)}{t} \quad \text{equation (4)}$$

504 
$$\frac{K_S}{A} = -\frac{FCP - e^{-K_D \cdot t}}{1 - e^{-K_D \cdot t}} \cdot K_D$$
 equation (5)

505 Where A is the protein starting abundance at the beginning of the labelling programme (7DPA).  
506 According to previous reports, protein synthesis cost was 5.25 ATP per residue including ribosome  
507 translation, protein transport and amino acid biosynthesis<sup>35,37</sup>, while the cost for protein degradation  
508 was approximately 1.25 ATP per residue through proteasome degradation pathway<sup>36</sup>. The ATP energy  
509 cost for protein turnover were therefore estimated by combining absolute protein copy number,  
510 amino acid length, protein turnover rates, grain ATP production and ATP energy cost per residue. The  
511 full-length intact peptide sequences of Chinese Spring glutenin subunits and gliadins were referred to  
512 long read sequencing data<sup>65,66</sup>. Detailed step-by-step explanations of both protein turnover rates and  
513 its ATP energy cost calculation were previously reported<sup>19,67</sup>.

514 **Gene expression data retrieval.** Gene expression data of the key storage proteins were downloaded  
515 from the Wheat Expression Browser website (<http://www.wheat-expression.com/>)<sup>68,69</sup>. Only Chinese  
516 Spring grain tissue data at 2, 14 and 30DPA under non-stress conditions (choulet\_URGI) were used in  
517 this study.

518 **Statistical analysis.** Data processing, statistical analysis and visualization were performed in the R  
519 environment (v.3.5.1). Statistical tests and replicate number are as shown in figure and figure legends.

520

## 521 Reference

- 522 1. Shewry, P. R. & Hey, S. J. The contribution of wheat to human diet and health. *Food Energy*  
523 *Secur* **4**, 178-202, doi:10.1002/fes3.64 (2015).
- 524 2. Foley, J. A. *et al.* Solutions for a cultivated planet. *Nature* **478**, 337-342,  
525 doi:10.1038/nature10452 (2011).
- 526 3. Tilman, D., Cassman, K. G., Matson, P. A., Naylor, R. & Polasky, S. Agricultural sustainability  
527 and intensive production practices. *Nature* **418**, 671-677, doi:10.1038/nature01014 (2002).
- 528 4. Voss-Fels, K. P. *et al.* Breeding improves wheat productivity under contrasting agrochemical  
529 input levels. *Nat Plants* **5**, 706-714, doi:10.1038/s41477-019-0445-5 (2019).
- 530 5. Muqaddasi, Q. H. *et al.* Prospects of GWAS and predictive breeding for European winter  
531 wheat's grain protein content, grain starch content, and grain hardness. *Scientific reports* **10**,  
532 12541, doi:10.1038/s41598-020-69381-5 (2020).
- 533 6. Shewry, P. R. Wheat. *Journal of experimental botany* **60**, 1537-1553, doi:10.1093/jxb/erp058  
534 (2009).
- 535 7. Cao, H. *et al.* Distinct metabolic changes between wheat embryo and endosperm during  
536 grain development revealed by 2D-DIGE-based integrative proteome analysis. *Proteomics*  
537 **16**, 1515-1536, doi:10.1002/pmic.201500371 (2016).
- 538 8. Duncan, O., Trosch, J., Fenske, R., Taylor, N. L. & Millar, A. H. Resource: Mapping the *Triticum*  
539 *aestivum* proteome. *The Plant journal : for cell and molecular biology* **89**, 601-616,  
540 doi:10.1111/tpj.13402 (2017).
- 541 9. Delcour, J. A. *et al.* Wheat Gluten Functionality as a Quality Determinant in Cereal-Based  
542 Food Products. *Annu Rev Food Sci T* **3**, 469-492, doi:10.1146/annurev-food-022811-101303  
543 (2012).
- 544 10. Dominguez, F. & Cejudo, F. J. Characterization of the Endoproteases Appearing during  
545 Wheat Grain Development. *Plant physiology* **112**, 1211-1217, doi:10.1104/pp.112.3.1211  
546 (1996).
- 547 11. Nadaud, I. *et al.* Proteomic and morphological analysis of early stages of wheat grain  
548 development. *Proteomics* **10**, 2901-2910, doi:10.1002/pmic.200900792 (2010).
- 549 12. Rangan, P., Furtado, A. & Henry, R. J. The transcriptome of the developing grain: a resource  
550 for understanding seed development and the molecular control of the functional and  
551 nutritional properties of wheat. *BMC genomics* **18**, 766, doi:10.1186/s12864-017-4154-z  
552 (2017).
- 553 13. Pedrazzini, E., Mainieri, D., Marrano, C. A. & Vitale, A. Where do Protein Bodies of Cereal  
554 Seeds Come From? *Frontiers in plant science* **7**, 1139, doi:10.3389/fpls.2016.01139 (2016).
- 555 14. Tosi, P. *et al.* Trafficking of storage proteins in developing grain of wheat. *Journal of*  
556 *experimental botany* **60**, 979-991, doi:10.1093/jxb/ern346 (2009).
- 557 15. Tahir, A. *et al.* Deciphering carbohydrate metabolism during wheat grain development via  
558 integrated transcriptome and proteome dynamics. *Molecular biology reports* **47**, 5439-5449,  
559 doi:10.1007/s11033-020-05634-w (2020).
- 560 16. McLoughlin, F. *et al.* Maize multi-omics reveal roles for autophagic recycling in proteome  
561 remodelling and lipid turnover. *Nat Plants* **4**, 1056-1070, doi:10.1038/s41477-018-0299-2  
562 (2018).
- 563 17. Reich, S. *et al.* A multi-omics analysis reveals the unfolded protein response regulon and  
564 stress-induced resistance to folate-based antimetabolites. *Nature communications* **11**, 2936,  
565 doi:10.1038/s41467-020-16747-y (2020).
- 566 18. Nelson, C. J. & Millar, A. H. Protein turnover in plant biology. *Nat Plants* **1**, doi:Artn  
567 1501710.1038/Nplants.2015.17 (2015).
- 568 19. Li, L. *et al.* Protein Degradation Rate in *Arabidopsis thaliana* Leaf Growth and Development.  
569 *The Plant cell* **29**, 207-228, doi:10.1105/tpc.16.00768 (2017).
- 570 20. Nelson, C. J., Li, L. & Millar, A. H. Quantitative analysis of protein turnover in plants.  
571 *Proteomics* **14**, 579-592, doi:10.1002/pmic.201300240 (2014).

- 572 21. Fan, K. T. *et al.* Proteome Scale-Protein Turnover Analysis Using High Resolution Mass  
573 Spectrometric Data from Stable-Isotope Labeled Plants. *Journal of proteome research* **15**,  
574 851-867, doi:10.1021/acs.jproteome.5b00772 (2016).
- 575 22. Galland, M. *et al.* Dynamic proteomics emphasizes the importance of selective mRNA  
576 translation and protein turnover during Arabidopsis seed germination. *Molecular & cellular*  
577 *proteomics : MCP* **13**, 252-268, doi:10.1074/mcp.M113.032227 (2014).
- 578 23. Lyon, D. *et al.* Drought and Recovery: Independently Regulated Processes Highlighting the  
579 Importance of Protein Turnover Dynamics and Translational Regulation in *Medicago*  
580 *truncatula*. *Molecular & cellular proteomics : MCP* **15**, 1921-1937,  
581 doi:10.1074/mcp.M115.049205 (2016).
- 582 24. Martin, S. F., Munagapati, V. S., Salvo-Chirnside, E., Kerr, L. E. & Le Bihan, T. Proteome  
583 turnover in the green alga *Ostreococcus tauri* by time course <sup>15</sup>N metabolic labeling mass  
584 spectrometry. *Journal of proteome research* **11**, 476-486, doi:10.1021/pr2009302 (2012).
- 585 25. Yao, S. X., Zhang, Y., Chen, Y. L., Deng, H. T. & Liu, J. Y. SILARS: an effective stable isotope  
586 labeling with ammonium nitrate-<sup>15</sup>N in rice seedlings for quantitative proteomic analysis.  
587 *Molecular plant* **7**, 1697-1700, doi:10.1093/mp/ssu089 (2014).
- 588 26. Nelson, C. J., Alexova, R., Jacoby, R. P. & Millar, A. H. Proteins with High Turnover Rate in  
589 Barley Leaves Estimated by Proteome Analysis Combined with in Planta Isotope Labeling.  
590 *Plant physiology* **166**, 91-108, doi:10.1104/pp.114.243014 (2014).
- 591 27. Dawson, T. E., Mambelli, S., Plamboeck, A. H., Templer, P. H. & Tu, K. P. Stable isotopes in  
592 plant ecology. *Annu Rev Ecol Syst* **33**, 507-559,  
593 doi:10.1146/annurev.ecolsys.33.020602.095451 (2002).
- 594 28. Rogers, S. O. & Quatrano, R. S. Morphological Staging of Wheat Caryopsis Development. *Am*  
595 *J Bot* **70**, 308-311, doi:Doi 10.2307/2443277 (1983).
- 596 29. Fischer, W. N. *et al.* Amino acid transport in plants. *Trends Plant Sci* **3**, 188-195, doi:Doi  
597 10.1016/S1360-1385(98)01231-X (1998).
- 598 30. Thimm, O. *et al.* MAPMAN: a user-driven tool to display genomics data sets onto diagrams of  
599 metabolic pathways and other biological processes. *Plant Journal* **37**, 914-939,  
600 doi:10.1111/j.1365-313X.2004.02016.x (2004).
- 601 31. Blum, A., Mayer, J. & Golan, G. Chemical Desiccation of Wheat Plants as a Simulator of Post-  
602 Anthesis Stress .2. Relations to Drought Stress. *Field Crop Res* **6**, 149-155, doi:Doi  
603 10.1016/0378-4290(83)90054-0 (1983).
- 604 32. Nelson, C. J., Li, L., Jacoby, R. P. & Millar, A. H. Degradation Rate of Mitochondrial Proteins in  
605 *Arabidopsis thaliana* Cells. *Journal of proteome research* **12**, 3449-3459,  
606 doi:10.1021/pr400304r (2013).
- 607 33. Hooper, C. M., Castleden, I. R., Aryamanesh, N., Jacoby, R. P. & Millar, A. H. Finding the  
608 Subcellular Location of Barley, Wheat, Rice and Maize Proteins: The Compendium of Crop  
609 Proteins with Annotated Locations (cropPAL). *Plant and Cell Physiology* **57**,  
610 doi:10.1093/pcp/pcv170 (2016).
- 611 34. Herman, E. M. & Larkins, B. A. Protein storage bodies and vacuoles. *The Plant cell* **11**, 601-  
612 613, doi:DOI 10.1105/tpc.11.4.601 (1999).
- 613 35. Kaleta, C., Schauble, S., Rinas, U. & Schuster, S. Metabolic costs of amino acid and protein  
614 production in *Escherichia coli*. *Biotechnol J* **8**, 1105-1114, doi:10.1002/biot.201200267  
615 (2013).
- 616 36. Peth, A., Nathan, J. A. & Goldberg, A. L. The ATP Costs and Time Required to Degrade  
617 Ubiquitinated Proteins by the 26 S Proteasome. *Journal of Biological Chemistry* **288**, 29215-  
618 29222 (2013).
- 619 37. Piques, M. *et al.* Ribosome and transcript copy numbers, polysome occupancy and enzyme  
620 dynamics in *Arabidopsis*. *Mol Syst Biol* **5** (2009).



- 621 38. Yang, X. Y. *et al.* Measuring the turnover rates of Arabidopsis proteins using deuterium  
622 oxide: an auxin signaling case study. *Plant Journal* **63**, 680-695, doi:10.1111/j.1365-  
623 313X.2010.04266.x (2010).
- 624 39. Flugge, U. I., Hausler, R. E., Ludewig, F. & Gierth, M. The role of transporters in supplying  
625 energy to plant plastids. *Journal of experimental botany* **62**, 2381-2392,  
626 doi:10.1093/jxb/erq361 (2011).
- 627 40. Jenner, C. F., Ugalde, T. D. & Aspinall, D. The Physiology of Starch and Protein Deposition in  
628 the Endosperm of Wheat. *Aust J Plant Physiol* **18**, 211-226, doi:Doi 10.1071/Pp9910211  
629 (1991).
- 630 41. Keeling, P. L., Wood, J. R., Tyson, R. H. & Bridges, I. G. Starch Biosynthesis in Developing  
631 Wheat-Grain - Evidence against the Direct Involvement of Triose Phosphates in the  
632 Metabolic Pathway. *Plant physiology* **87**, 311-319, doi:DOI 10.1104/pp.87.2.311 (1988).
- 633 42. Zorb, C., Ludewig, U. & Hawkesford, M. J. Perspective on Wheat Yield and Quality with  
634 Reduced Nitrogen Supply. *Trends Plant Sci* **23**, 1029-1037, doi:10.1016/j.tplants.2018.08.012  
635 (2018).
- 636 43. Barak, S., Mudgil, D. & Khatkar, B. S. Influence of Gliadin and Glutenin Fractions on  
637 Rheological, Pasting, and Textural Properties of Dough. *Int J Food Prop* **17**, 1428-1438,  
638 doi:10.1080/10942912.2012.717154 (2014).
- 639 44. Dhaka, V. & Khatkar, B. S. Effects of Gliadin/Glutenin and Hmw-Gs/Lmw-Gs Ratio on Dough  
640 Rheological Properties and Bread-Making Potential of Wheat Varieties. *J Food Quality* **38**, 71-  
641 82, doi:10.1111/jfq.12122 (2015).
- 642 45. Geisslitz, S., Longin, C. F. H., Scherf, K. A. & Koehler, P. Comparative Study on Gluten Protein  
643 Composition of Ancient (Einkorn, Emmer and Spelt) and Modern Wheat Species (Durum and  
644 Common Wheat). *Foods* **8**, doi:10.3390/foods8090409 (2019).
- 645 46. Galili, G. *et al.* Assembly and Transport of Wheat Storage Proteins. *Journal of plant*  
646 *physiology* **145**, 626-631, doi:Doi 10.1016/S0176-1617(11)81274-5 (1995).
- 647 47. Abreu, R. D., Penalva, L. O., Marcotte, E. M. & Vogel, C. Global signatures of protein and  
648 mRNA expression levels. *Molecular bioSystems* **5**, 1512-1526, doi:10.1039/b908315d (2009).
- 649 48. Zander, M. *et al.* Integrated multi-omics framework of the plant response to jasmonic acid.  
650 *Nat Plants* **6**, 290+, doi:10.1038/s41477-020-0605-7 (2020).
- 651 49. Brady, S. M. *et al.* A high-resolution root spatiotemporal map reveals dominant expression  
652 patterns. *Science* **318**, 801-806, doi:10.1126/science.1146265 (2007).
- 653 50. Pfeifer, M. *et al.* Genome interplay in the grain transcriptome of hexaploid bread wheat.  
654 *Science* **345**, 1250091, doi:10.1126/science.1250091 (2014).
- 655 51. Selkig, J. *et al.* Spatiotemporal proteomics uncovers cathepsin-dependent macrophage cell  
656 death during Salmonella infection. *Nat Microbiol*, doi:10.1038/s41564-020-0736-7 (2020).
- 657 52. Munns, R. & James, R. A. Screening methods for salinity tolerance: a case study with  
658 tetraploid wheat. *Plant Soil* **253**, 201-218, doi:Doi 10.1023/A:1024553303144 (2003).
- 659 53. Scafaro, A. P. *et al.* The combination of gas-phase fluorophore technology and automation to  
660 enable high-throughput analysis of plant respiration. *Plant Methods* **13**, 16,  
661 doi:10.1186/s13007-017-0169-3 (2017).
- 662 54. Wessel, D. & Flugge, U. I. A Method for the Quantitative Recovery of Protein in Dilute-  
663 Solution in the Presence of Detergents and Lipids. *Analytical biochemistry* **138**, 141-143,  
664 doi:Doi 10.1016/0003-2697(84)90782-6 (1984).
- 665 55. Schaffner, W. & Weissmann, C. A rapid, sensitive, and specific method for the determination  
666 of protein in dilute solution. *Analytical biochemistry* **56**, 502-514, doi:10.1016/0003-  
667 2697(73)90217-0 (1973).
- 668 56. Wang, Y. *et al.* Reversed-phase chromatography with multiple fraction concatenation  
669 strategy for proteome profiling of human MCF10A cells. *Proteomics* **11**, 2019-2026,  
670 doi:10.1002/pmic.201000722 (2011).

- 671 57. Deutsch, E. W. *et al.* Trans-Proteomic Pipeline, a standardized data processing pipeline for  
672 large-scale reproducible proteomics informatics. *Proteomics Clin Appl* **9**, 745-754,  
673 doi:10.1002/prca.201400164 (2015).
- 674 58. Appels, R. *et al.* Shifting the limits in wheat research and breeding using a fully annotated  
675 reference genome. *Science* **361**, 661+, doi:ARTN eaar719110.1126/science.aar7191 (2018).
- 676 59. Eng, J. K., Jahan, T. A. & Hoopmann, M. R. Comet: an open-source MS/MS sequence  
677 database search tool. *Proteomics* **13**, 22-24, doi:10.1002/pmic.201200439 (2013).
- 678 60. O'Leary, B. M. *et al.* Variation in Leaf Respiration Rates at Night Correlates with  
679 Carbohydrate and Amino Acid Supply. *Plant physiology* **174**, 2261-2273,  
680 doi:10.1104/pp.17.00610 (2017).
- 681 61. Cox, J. & Mann, M. MaxQuant enables high peptide identification rates, individualized p.p.b.-  
682 range mass accuracies and proteome-wide protein quantification. *Nat Biotechnol* **26**, 1367-  
683 1372, doi:10.1038/nbt.1511 (2008).
- 684 62. Tyanova, S., Temu, T. & Cox, J. The MaxQuant computational platform for mass  
685 spectrometry-based shotgun proteomics. *Nature protocols* **11**, 2301-2319,  
686 doi:10.1038/nprot.2016.136 (2016).
- 687 63. Kryuchkova-Mostacci, N. & Robinson-Rechavi, M. A benchmark of gene expression tissue-  
688 specificity metrics. *Brief Bioinform* **18**, 205-214, doi:10.1093/bib/bbw008 (2017).
- 689 64. Hamilton, N. E. & Ferry, M. ggtern: Ternary Diagrams Using ggplot2. *J Stat Softw* **87**, 1-17,  
690 doi:10.18637/jss.v087.c03 (2018).
- 691 65. Huo, N. *et al.* Gene Duplication and Evolution Dynamics in the Homeologous Regions  
692 Harboring Multiple Prolamin and Resistance Gene Families in Hexaploid Wheat. *Frontiers in*  
693 *plant science* **9**, 673, doi:10.3389/fpls.2018.00673 (2018).
- 694 66. Huo, N. *et al.* Dynamic Evolution of alpha-Gliadin Prolamin Gene Family in Homeologous  
695 Genomes of Hexaploid Wheat. *Scientific reports* **8**, 5181, doi:10.1038/s41598-018-23570-5  
696 (2018).
- 697 67. Li, L., Nelson, J., Solheim, C., Whelan, J. & Millar, A. H. Determining degradation and  
698 synthesis rates of arabidopsis proteins using the kinetics of progressive <sup>15</sup>N labeling of two-  
699 dimensional gel-separated protein spots. *Molecular & cellular proteomics : MCP* **11**,  
700 M111.010025, doi:10.1074/mcp.M111.010025 (2012).
- 701 68. Borrill, P., Ramirez-Gonzalez, R. & Uauy, C. expVIP: a Customizable RNA-seq Data Analysis  
702 and Visualization Platform. *Plant physiology* **170**, 2172-2186, doi:10.1104/pp.15.01667  
703 (2016).
- 704 69. Ramirez-Gonzalez, R. H. *et al.* The transcriptional landscape of polyploid wheat. *Science* **361**,  
705 doi:10.1126/science.aar6089 (2018).

706

707

708 **Acknowledgements**

709 H.C was supported by Research Training Program Fee Offset – International Student and UWA  
710 Safety-Net Top-Up Scholarships. This work was supported by Australian Research Council funding to  
711 A.H.M (CE140100008; FL200100057)

712 **Author contributions**

713 H.C, O.D and A.H.M conceived and designed the project. H.C and O.D performed the experiment and  
714 data analysis. H.C wrote the manuscript, A.H.M and O.D read and corrected the manuscript.

715 **Competing interests**

716 The authors declare no competing interests

717

718 **Figure legends**

719 **Fig. 1. | Time-dependent changes in grain size, fresh weight, respiration rate and <sup>15</sup>N labelling of**  
720 **newly synthesised protein. a,** A representative image of wheat grain at different developmental  
721 stages. **b,** The fresh weight of individual grain at different developmental stages ( $n = 64$ ). **c,** The <sup>15</sup>N  
722 enrichment in newly synthesised proteins at 10, 14 and 17DPA after a switch to <sup>15</sup>N media at 7DPA. **d,**  
723 Respiration rate ( $R_N$ ) of wheat grain at different developmental stages expressed as O<sub>2</sub> consumption  
724 rate (nmol O<sub>2</sub> per gram fresh weight per second;  $n = 64$ ). Detailed data used in this analysis are listed  
725 in Supplementary Data 1.

726 **Fig. 2. | Fold change in abundance (FCP) of 2307 proteins during wheat grain development. a,**  
727 Volcano plots of all fold changes in protein abundance at each time point. Proteins with a fold change  
728 in abundance  $\geq 2$  or  $\leq 0.5$  and with a p-value  $\leq 0.05$  are shown by red circles (increase abundance) or  
729 blue circles (decrease abundance), respectively. All other data points are shown as black circles. The  
730 number of proteins of each colour is shown on the top-left corner of each plot, and dashed lines  
731 indicate the cut-off value of fold change in protein abundance and p-value. **b,** Examples of slow FCP  
732 of ribosomal proteins compared to the rapid accumulation of storage proteins during grain  
733 development. **c,** Proteins with fold change in abundance between 7DPA and 17DPA are shown in 34  
734 functional categories ( $\geq 10$  proteins) within 7 broad functional categories. Proteins in all other  
735 categories ( $\leq 10$  proteins per category) are grouped into the 'Others' category. The number of proteins  
736 in each category is displayed along with x-axis, and functional categories were sorted within each  
737 super category by increasing median FCP. The y-axis is log<sub>2</sub> transformed FCP and the dashed line  
738 shows the overall median FCP across all wheat grain proteins. Pairwise t-test results between  
739 categories are listed on Supplementary Data 4b. Broad functional categories are: Amino acid  
740 metabolism (Green), Carbohydrate metabolism (Orange-red), Nucleotide metabolism (Purple), Lipid  
741 metabolism (Pink), Energy producing (Lawngreen), Stress response (Gold) and 'Other' categories  
742 (Black).

743 **Fig. 3. | Rates of synthesis and degradation of 1447 wheat grain proteins during grain development.**

744 **a**, The averaged protein synthesis ( $K_s/A$ ) and degradation ( $K_D$ ) rates calculated across all three time  
745 points grouped by the subcellular location of each protein (CropPAL.org). The major subcellular  
746 locations highlighted are Mitochondria (Mt, Pink), Cytosol (Cyt, Green), Plastid (Pt, Lawngreen),  
747 Nucleus (Nc, Gold), Golgi Apparatus (G1, Purple), Extracellular (Et, Orange-red), and Vacuole (Vc, Peru).  
748 Dashed lines indicate the overall median  $K_s/A$  and  $K_D$  across all proteins. The number of proteins in  
749 each subcellular location is displayed next to the y-axis. Boxes are sorted by increasing order of median  
750  $K_s/A$ . **b**, The averaged protein synthesis and degradation rates calculated across the three time points  
751 grouped by both subcellular location and functional category. Only major functional categories with  
752 protein no.  $\geq 10$  were displayed, and minor categories with protein no.  $< 10$  were grouped into 'Others'.  
753 The colour scheme was the same used in **a**. **c**, Examples of 6 functional categories of interest showing  
754 the largest difference (upper panel) and smallest difference (lower panel) between  $K_s/A$  and  $K_D$  at each  
755 time point. Detailed statistical analysis is explained, and relevant results are listed in Supplementary  
756 Data 5c.

757 **Fig. 4. | Changes in protein abundance and protein synthesis and degradation rate profiles of**

758 **proteins expressed in different grain tissue types during grain development.** **a**, A ternary plot of the  
759 abundances of 5550 protein groups measured in Endosperm, Embryo and Pericarp extracts from grain.  
760 Each circle represents a protein and its position indicates the relative contribution of each protein to  
761 grain tissue in grain protein abundance. Proteins with a relative contribution  $\geq 66\%$  in one tissue and  
762 a protein concentration  $\geq 3$ -fold that in the other two tissues are defined as tissue-specific proteins  
763 (shown close to triangle vertices), proteins with a relative contribution  $\leq 17\%$  in one tissue are defined  
764 as tissue-suppressed proteins (between vertices and close to edges), while the remaining proteins are  
765 found relatively evenly balanced across grain tissues (grey circles in the middle). **b**, Box plots of the  
766 relative protein contribution (upper panel) and actual relative abundance estimated via label free  
767 quantification (lower panel) for each tissue in each protein expression category. **c**, Line plots showing  
768 FCP (Blue), protein synthesis rate (Orange) and protein degradation rate (Green) of balanced and

769 tissue specific protein sets during grain development. Only proteins having values (FCP or turnover  
770 rates) at all three time points are included. The dashed line demonstrates the mean values, and the  
771 grey shade area shows the 95% confidence intervals. The optimized y-axis scale version are inserted  
772 for embryo and pericarp specific proteins to highlight the change pattern.

773 **Fig. 5. | ATP energy budget used in wheat grain proteome synthesis and maintenance during grain**  
774 **development. a**, The overall proportion of cellular ATP budget used for protein synthesis, protein  
775 degradation, and other cell events and maintenance. **b**, proportional distributions of protein copy  
776 numbers (iBAQ) and ATP cost of protein building and maintenance of major cellular organelles and  
777 subcellular structures. Proteins in location groups sorted by decreasing ATP usage for protein synthesis.  
778 The number of proteins in each category is included within brackets. **c**, proportional distributions of  
779 protein copy numbers (iBAQ) and ATP cost of protein building and maintenance of protein in major  
780 functional categories. **d**, Bubble plots showing, by the size of circles, the changing profiles of cellular  
781 ATP energy budget for different classes of proteins during grain development. The top three functional  
782 categories having both fast  $K_S/A$  and  $K_D$  rates (Orange-red), fast  $K_S/A$  and slow  $K_D$  rates (Violet-red),  
783 and both slow  $K_S/A$  and  $K_D$  rates (Blue) are highlighted. Calculations are based on grain total ATP  
784 production in **a**, but based on total ATP energy budget for protein synthesis or degradation in **b**, **c** and  
785 **d**.

786 **Fig. 6. | Accumulation profiles of key storage protein families during grain filling. a**, The example  
787 radar chart. Six categories of data were collected and analysed, namely transcript data (mRNA, rang:  
788 0-1000 tpm), fold change in protein abundance (FCP, rang: 1-25 folds), protein synthesis rate ( $K_S/A$ ,  
789 rang: 0-5.84  $d^{-1}$ ), ATP energy cost for protein synthesis (CostSyn, rang: 0-290.2 nmol ATP mcopy $^{-1}$  grain $^{-1}$   
790  $d^{-1}$ ), protein degradation rate ( $K_D$ , rang: 0-1.36  $d^{-1}$ ), and ATP energy cost for protein degradation  
791 (CostDeg, rang: 0-51.6 nmol ATP mcopy $^{-1}$  grain $^{-1}$   $d^{-1}$ ). mRNA  $\geq$  1000 tpm and FCP  $\geq$  25-fold were treated  
792 as 100%, while missing values were replaced by 0 for visualization. The percentage normalisation was  
793 conducted across all proteins and time points allows comparisons to be made in time series and

794 between protein types. The raw data and statistical test results are collected at Supplementary Data  
795 8. **b**, Radar charts showing the six molecular profiles of the key wheat grain storage proteins at 10, 14,  
796 and 17DPA during grain filling. **c**, Abundance of the key wheat grain storage proteins at 17DPA.

797

798 **Figures**

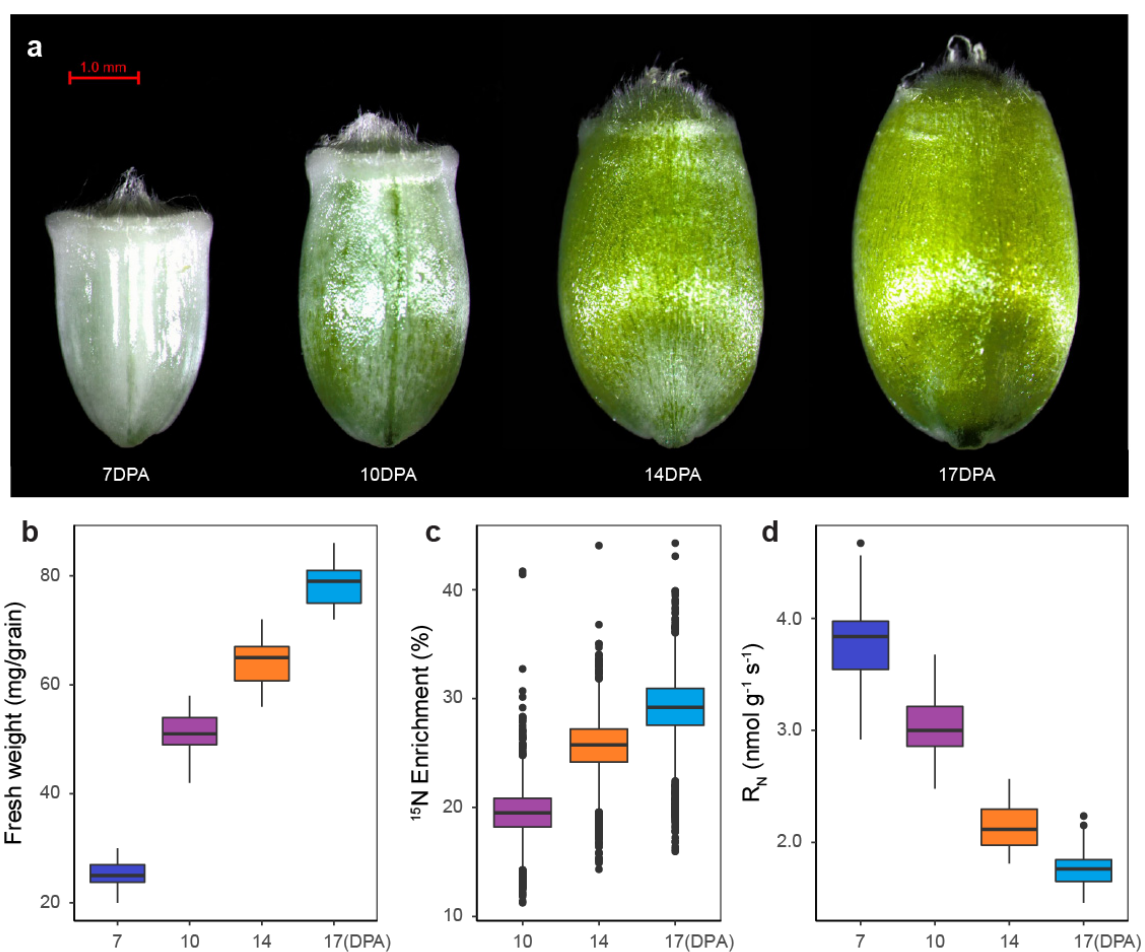

799

800 **Fig. 1. | Time-dependent changes in grain size, fresh weight, respiration rate and <sup>15</sup>N labelling of**  
801 **newly synthesised protein. a,** A representative image of wheat grain at different developmental  
802 stages. **b,** The fresh weight of individual grain at different developmental stages (*n* = 64). **c,** The <sup>15</sup>N  
803 enrichment in newly synthesised proteins at 10, 14 and 17DPA after a switch to <sup>15</sup>N media at 7DPA. **d,**  
804 Respiration rate (R<sub>N</sub>) of wheat grain at different developmental stages expressed as O<sub>2</sub> consumption  
805 rate (nmol O<sub>2</sub> per gram fresh weight per second; *n* = 64). Detailed data used in this analysis are listed  
806 in Supplementary Data 1.

807



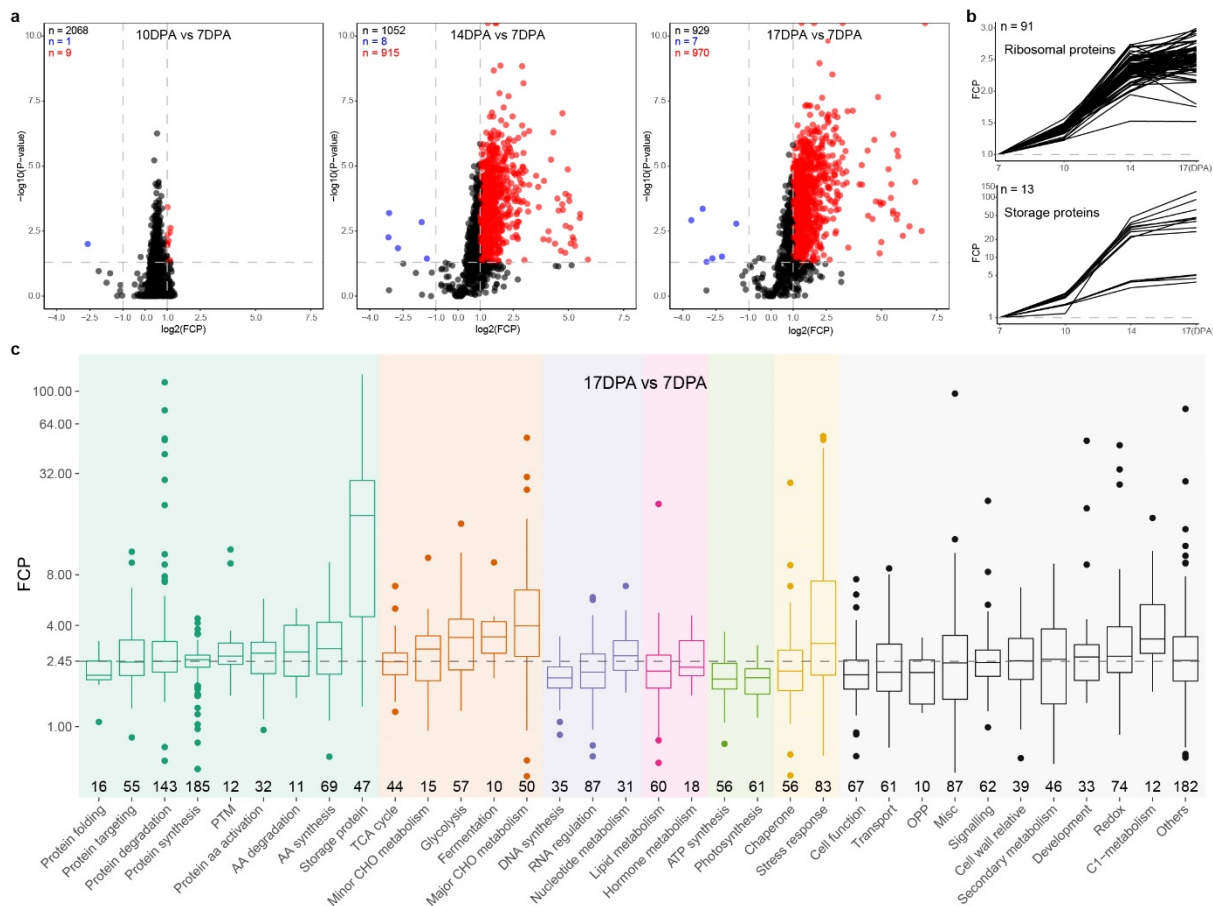

808

809 **Fig. 2. | Fold change in abundance (FCP) of 2307 proteins during wheat grain development. a,**  
 810 **Volcano plots of all fold changes in protein abundance at each time point. Proteins with a fold change**  
 811 **in abundance  $\geq 2$  or  $\leq 0.5$  and with a p-value  $\leq 0.05$  are shown by red circles (increase abundance) or**  
 812 **blue circles (decrease abundance), respectively. All other data points are show as black circles. The**  
 813 **number of proteins of each colour is shown on the top-left corner of each plot, and dashed lines**  
 814 **indicate the cut-off value of fold change in protein abundance and p-value. b, Examples of slow FCP**  
 815 **of ribosomal proteins compared to the rapid accumulation of storage proteins during grain**  
 816 **development. c, Proteins with fold change in abundance between 7DPA and 17DPA are shown in 34**  
 817 **functional categories ( $\geq 10$  proteins) within 7 broad functional categories. Proteins in all other**  
 818 **categories ( $\leq 10$  proteins per category) are grouped into the ‘Others’ category. The number of proteins**  
 819 **in each category is displayed along with x-axis, and functional categories were sorted within each**  
 820 **super category by increasing median FCP. The y-axis is log2 transformed FCP and the dashed line**  
 821 **shows the overall median FCP across all wheat grain proteins. Pairwise t-test results between**  
 822 **categories are listed on Supplementary Data 4b. Broad functional categories are: Amino acid**  
 823 **metabolism (Green), Carbohydrate metabolism (Orange-red), Nucleotide metabolism (Purple), Lipid**  
 824 **metabolism (Pink), Energy producing (Lawngreen), Stress response (Gold) and ‘Other’ categories**  
 825 **(Black).**

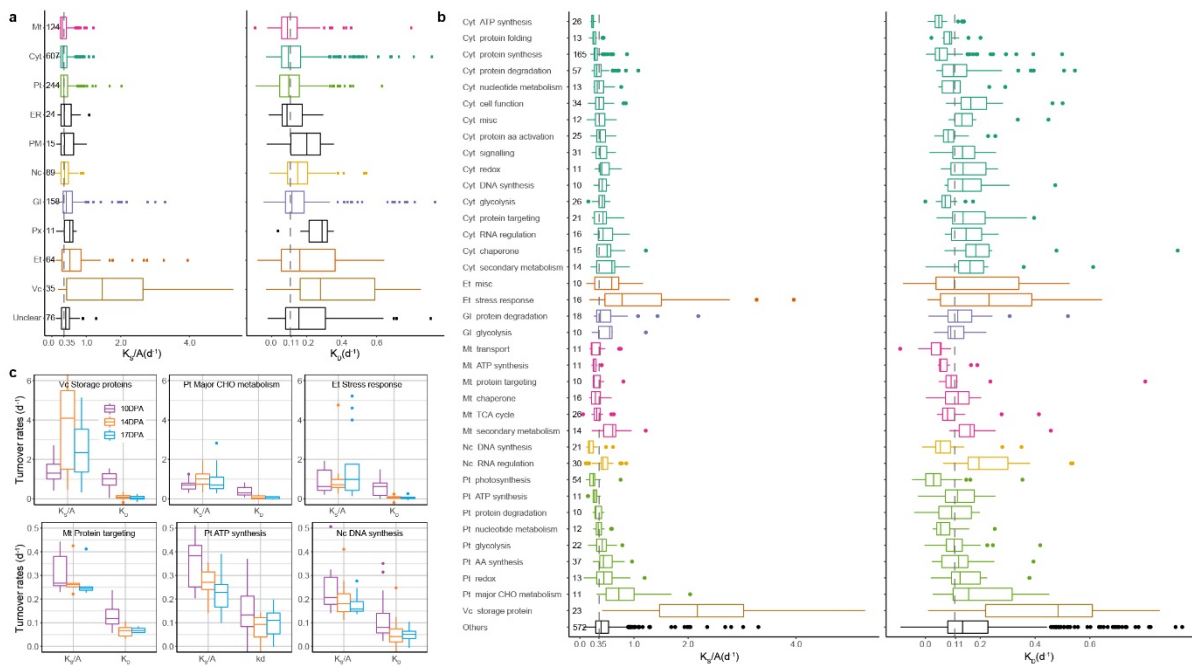

826

827 **Fig. 3. | Rates of synthesis and degradation of 1447 wheat grain proteins during grain development.**

828 **a**, The averaged protein synthesis ( $K_S/A$ ) and degradation ( $K_D$ ) rates calculated across all three time  
 829 points grouped by the subcellular location of each protein (CropPAL.org). The major subcellular  
 830 locations highlighted are Mitochondria (Mt, Pink), Cytosol (Cyt, Green), Plastid (Pt, Lawngreen),  
 831 Nucleus (Nc, Gold), Golgi Apparatus (Gt, Purple), Extracellular (Et, Orange-red), and Vacuole (Vc, Peru).  
 832 Dashed lines indicate the overall median  $K_S/A$  and  $K_D$  across all proteins. The number of proteins in  
 833 each subcellular location is displayed next to the y-axis. Boxes are sorted by increasing order of median  
 834  $K_S/A$ . **b**, The averaged protein synthesis and degradation rates calculated across the three time points  
 835 grouped by both subcellular location and functional category. Only major functional categories with  
 836 protein no.  $\geq 10$  were displayed, and minor categories with protein no.  $< 10$  were grouped into 'Others'.  
 837 The colour scheme was the same used in **a**. **c**, Examples of 6 functional categories of interest showing  
 838 the largest difference (upper panel) and smallest difference (lower panel) between  $K_S/A$  and  $K_D$  at each  
 839 time point. Detailed statistical analysis is explained, and relevant results are listed in Supplementary  
 840 Data 5c.

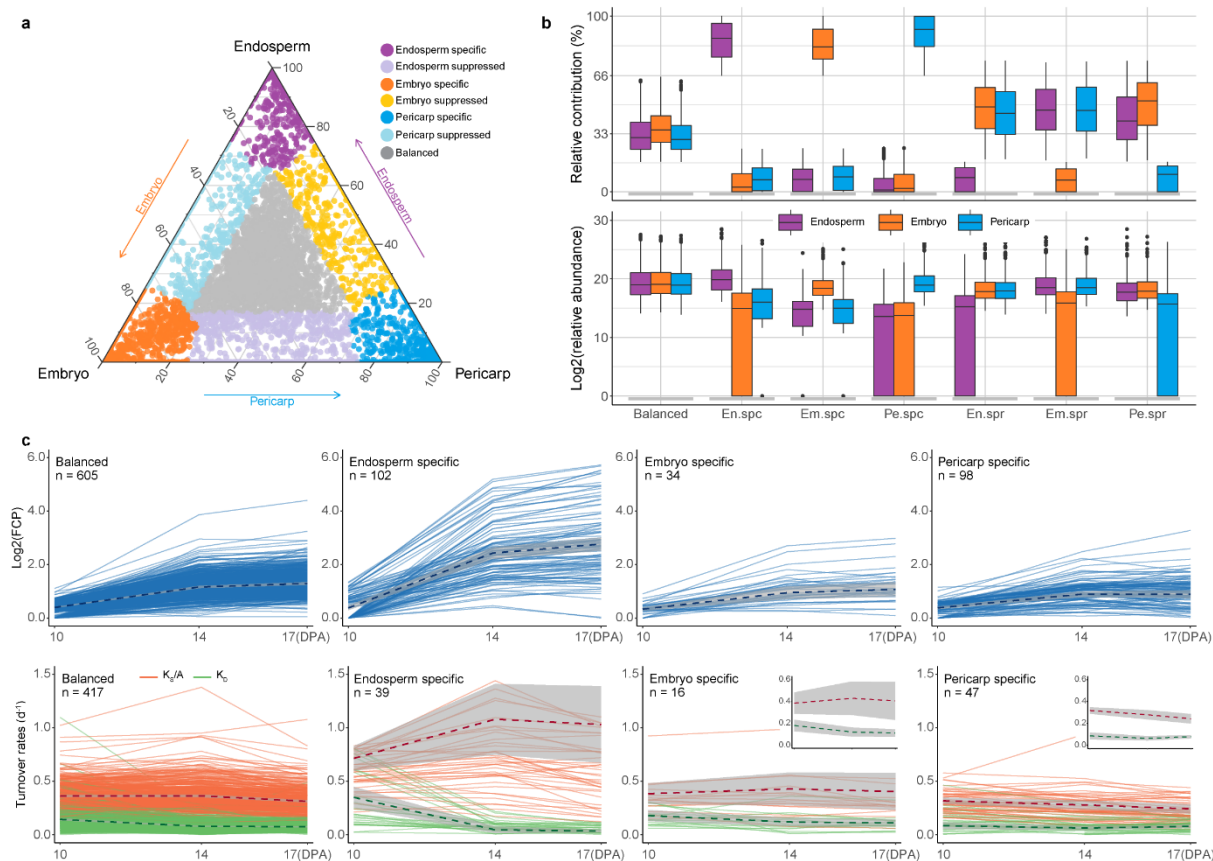

841

842 **Fig. 4. | Changes in protein abundance and protein synthesis and degradation rate profiles of**  
 843 **proteins expressed in different grain tissue types during grain development. a**, A ternary plot of the  
 844 abundances of 5550 protein groups measured in Endosperm, Embryo and Pericarp extracts from grain.  
 845 Each circle represents a protein and its position indicates the relative contribution of each protein to  
 846 grain tissue in grain protein abundance. Proteins with a relative contribution  $\geq 66\%$  in one tissue and  
 847 a protein concentration  $\geq 3$ -fold that in the other two tissues are defined as tissue-specific proteins  
 848 (shown close to triangle vertices), proteins with a relative contribution  $\leq 17\%$  in one tissue are defined  
 849 as tissue-suppressed proteins (between vertices and close to edges), while the remaining proteins are  
 850 found relatively evenly balanced across grain tissues (grey circles in the middle). **b**, Box plots of the  
 851 relative protein contribution (upper panel) and actual relative abundance estimated via label free  
 852 quantification (lower panel) for each tissue in each protein expression category. **c**, Line plots showing  
 853 FCP (Blue), protein synthesis rate (Orange) and protein degradation rate (Green) of balanced and  
 854 tissue specific protein sets during grain development. Only proteins having values (FCP or turnover  
 855 rates) at all three time points are included. The dashed line demonstrates the mean values, and the  
 856 grey shade area shows the 95% confidence intervals. The optimized y-axis scale version are inserted  
 857 for embryo and pericarp specific proteins to highlight the change pattern.

858

859

860

861

862

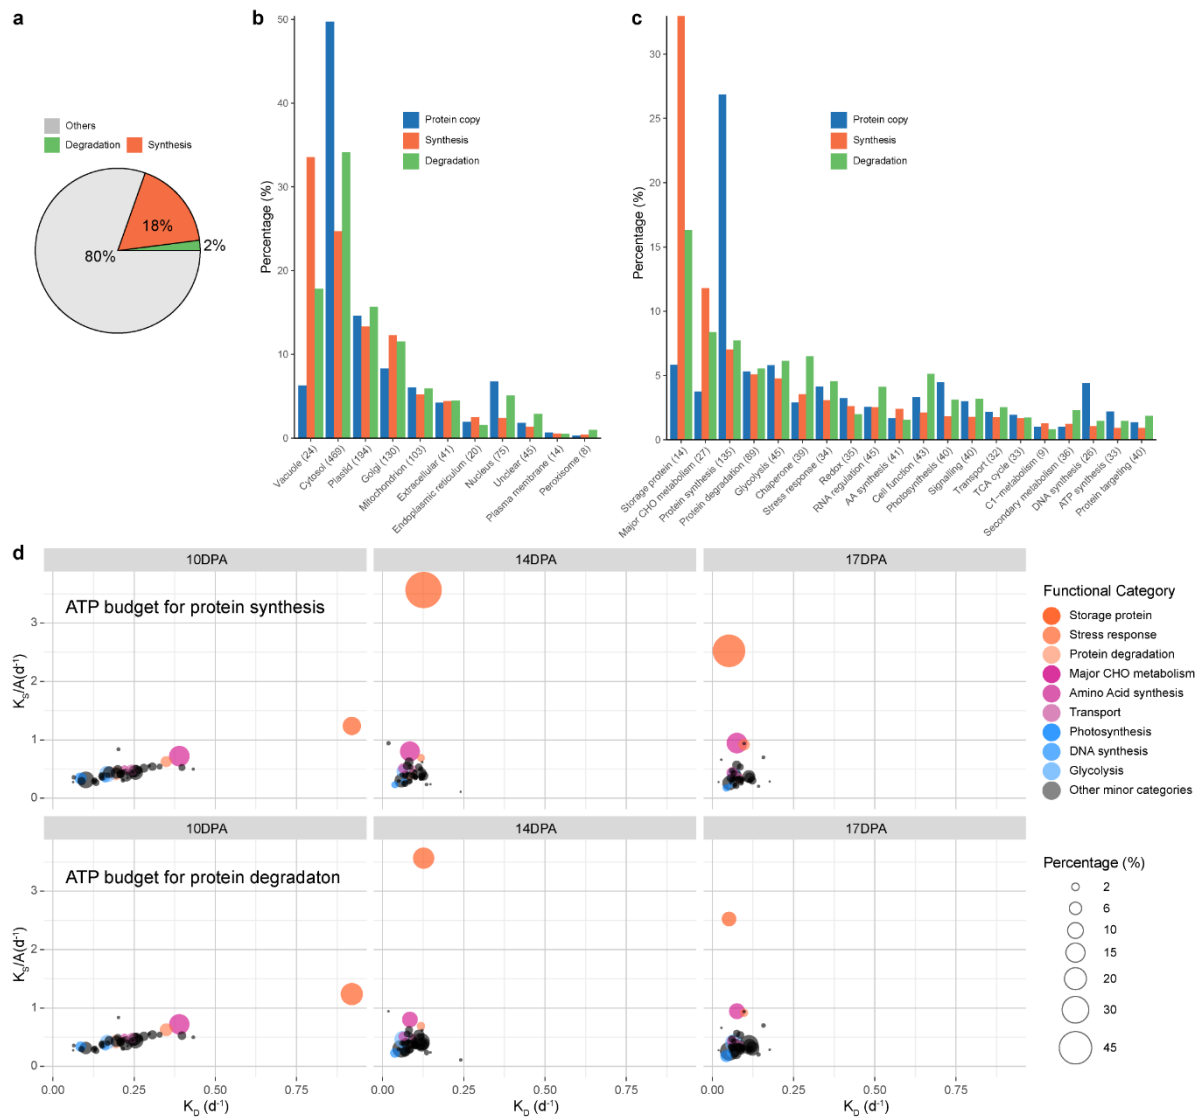

863

864 **Fig. 5. | ATP energy budget used in wheat grain proteome synthesis and maintenance during grain**  
 865 **development.** **a**, The overall proportion of cellular ATP budget used for protein synthesis, protein  
 866 degradation, and other cell events and maintenance. **b**, proportional distributions of protein copy  
 867 numbers (iBAQ) and ATP cost of protein building and maintenance of major cellular organelles and  
 868 subcellular structures. Proteins in location groups sorted by decreasing ATP usage for protein synthesis.  
 869 The number of proteins in each category is included within brackets. **c**, proportional distributions of  
 870 protein copy numbers (iBAQ) and ATP cost of protein building and maintenance of protein in major  
 871 functional categories. **d**, Bubble plots showing, by the size of circles, the changing profiles of cellular  
 872 ATP energy budget for different classes of proteins during grain development. The top three functional  
 873 categories having both fast  $K_S/A$  and  $K_D$  rates (Orange-red), fast  $K_S/A$  and slow  $K_D$  rates (Violet-red),  
 874 and both slow  $K_S/A$  and  $K_D$  rates (Blue) are highlighted. Calculations are based on grain total ATP  
 875 production in **a**, but based on total ATP energy budget for protein synthesis or degradation in **b**, **c** and  
 876 **d**.

877

878

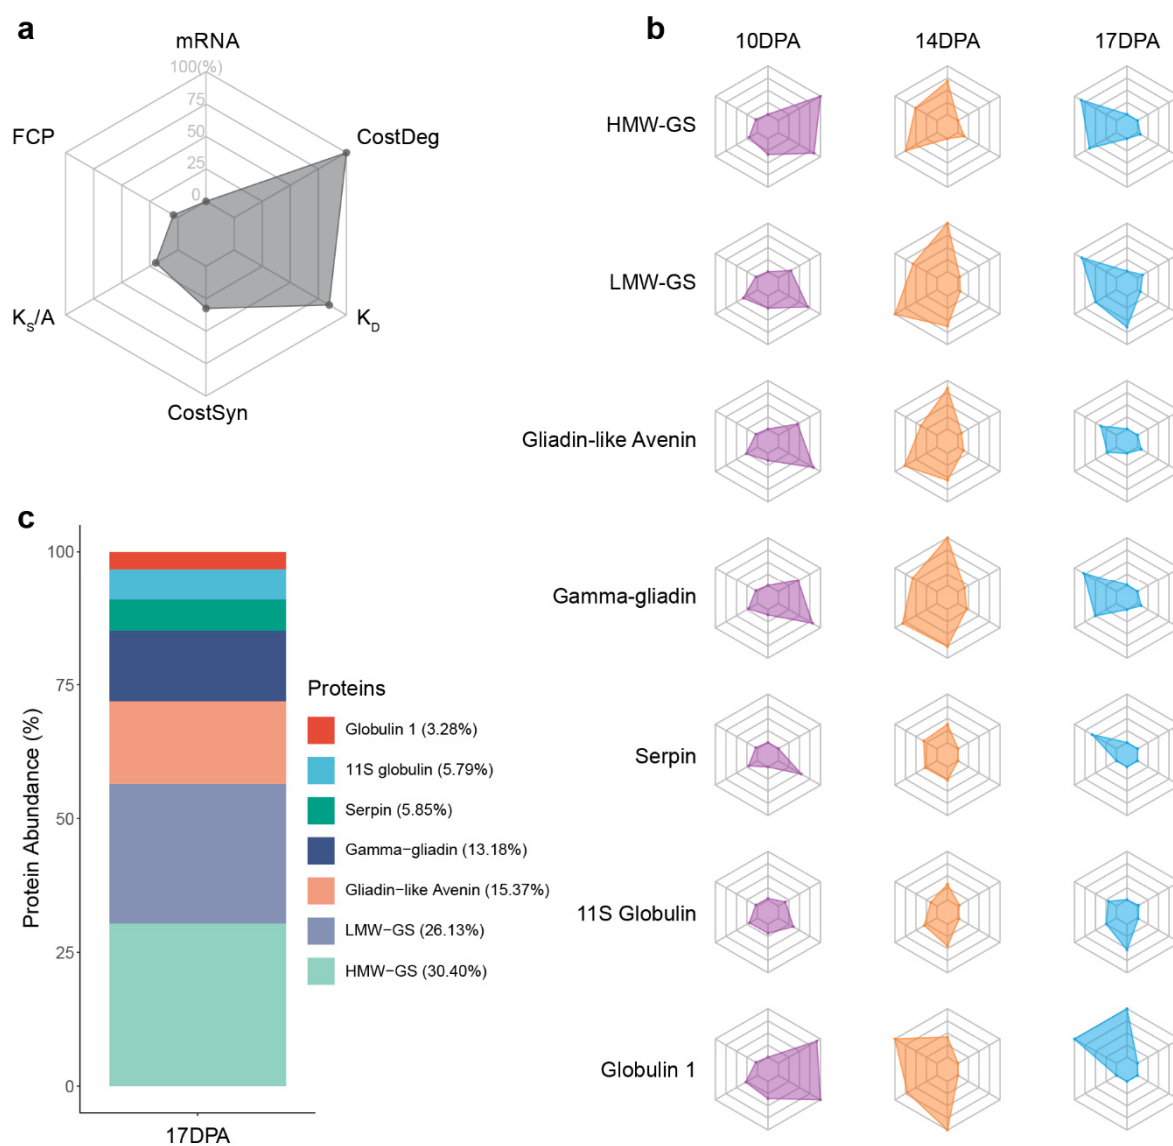

879

880 **Fig. 6. | Accumulation profiles of key storage proteins during grain filling.** **a**, The example radar chart.  
 881 Six categories of data were collected and analysed, namely transcript data (mRNA, rang: 0-1000 tpm),  
 882 fold change in protein abundance (FCP, rang: 1-25 folds), protein synthesis rate ( $K_S/A$ , rang: 0-5.84 d<sup>-1</sup>),  
 883 ATP energy cost for protein synthesis (CostSyn, rang: 0-290.2 nmol ATP mcopy<sup>-1</sup> grain<sup>-1</sup> d<sup>-1</sup>), protein  
 884 degradation rate ( $K_D$ , rang: 0-1.36 d<sup>-1</sup>), and ATP energy cost for protein degradation (CostDeg, rang: 0-  
 885 51.6 nmol ATP mcopy<sup>-1</sup> grain<sup>-1</sup> d<sup>-1</sup>). mRNA  $\geq$  1000 tpm and FCP  $\geq$  25-fold were treated as 100%, while  
 886 missing values were replaced by 0 for visualization. The percentage normalisation was conducted  
 887 across all proteins and time points allows comparisons to be made in time series and between protein  
 888 types. The raw data and statistical test results are collected at Supplementary Data 8. **b**, Radar charts  
 889 showing the six molecular profiles of the key wheat grain storage proteins at 10, 14, and 17DPA during  
 890 grain filling. **c**, Abundance of the key wheat grain storage proteins at 17DPA.

891

892 **Extended Data Tables**

893 **Extended Data Table 1. The 20 most rapidly synthesized and degraded wheat grain proteins during grain**  
 894 **development.**

| Accession                                   | Protein Name        | Location      | Functional Category  | Rates (d <sup>-1</sup> ) | Brep No. | Pep No. | Spectra No. | Half-Life (d) |
|---------------------------------------------|---------------------|---------------|----------------------|--------------------------|----------|---------|-------------|---------------|
| <b>20 most rapidly synthesized proteins</b> |                     |               |                      |                          |          |         |             |               |
| TraesCS1D01G000300.1                        | LMW-GS              | vacuole       | storage protein      | 5.27                     | 5        | 8       | 15          | NA            |
| TraesCS1A01G007400.1                        | Gamma-gliadin       | vacuole       | storage protein      | 4.37                     | 7        | 7       | 19          | NA            |
| TraesCS1D01G000200.1                        | LMW-GS              | vacuole       | storage protein      | 4.27                     | 6        | 8       | 30          | NA            |
| TraesCS1A01G066100.1                        | Globulin-11S        | vacuole       | storage protein      | 4.22                     | 6        | 27      | 49          | NA            |
| TraesCS7B01G072000.1                        | Alpah-AI            | extracellular | stress response      | 3.96                     | 7        | 8       | 11          | NA            |
| TraesCS1B01G084300.1                        | Globulin-11S        | vacuole       | storage protein      | 3.41                     | 6        | 13      | 21          | NA            |
| TraesCS3A01G095600.1                        | Alpha-AI            | golgi         | stress response      | 3.3                      | 4        | 4       | 8           | NA            |
| TraesCS4B01G328000.1                        | Alpah-AI            | extracellular | stress response      | 3.27                     | 4        | 6       | 8           | NA            |
| TraesCS1B01G330000.1                        | HMW-GS              | vacuole       | storage protein      | 3.16                     | 7        | 21      | 32          | NA            |
| TraesCS5A01G554200.1                        | Beta-amylase        | golgi         | major CHO metabolism | 3.02                     | 6        | 14      | 21          | NA            |
| TraesCS7D01G031700.1                        | Gliadin-like avenin | vacuole       | storage protein      | 2.89                     | 6        | 14      | 32          | NA            |
| TraesCS4A01G296000.1                        | Globulin 1          | vacuole       | storage protein      | 2.85                     | 4        | 6       | 8           | NA            |
| TraesCS1A01G007700.1                        | Gamma-gliadin       | vacuole       | storage protein      | 2.84                     | 3        | 5       | 12          | NA            |
| TraesCSU01G032700.1                         | Beta-amylase        | golgi         | major CHO metabolism | 2.8                      | 8        | 44      | 92          | NA            |
| TraesCS4D01G325000.1                        | Alpah-AI            | extracellular | stress response      | 2.77                     | 4        | 8       | 22          | NA            |
| TraesCSU01G103300.1                         | Peroxidase          | extracellular | redox                | 2.69                     | 5        | 13      | 21          | NA            |
| TraesCS1B01G013500.1                        | LMW-GS              | vacuole       | storage protein      | 2.46                     | 5        | 7       | 13          | NA            |
| TraesCS4A01G112300.1                        | GILT                | extracellular | not assigned         | 2.35                     | 5        | 16      | 27          | NA            |
| TraesCS1D01G317300.1                        | HMW-GS              | vacuole       | storage protein      | 2.21                     | 3        | 4       | 5           | NA            |
| TraesCS6D01G356600.1                        | Aspartic proteinase | golgi         | protein degradation  | 2.19                     | 9        | 37      | 57          | NA            |
| <b>20 most rapidly degraded proteins</b>    |                     |               |                      |                          |          |         |             |               |
| TraesCS6D01G000200.1                        | Alpha-AI            | golgi         | stress response      | 0.94                     | 3        | 11      | 16          | 0.74          |
| TraesCS4D01G212300.1                        | HSP                 | cytosol       | chaperone            | 0.92                     | 3        | 3       | 4           | 0.75          |
| TraesCS2A01G310300.2                        | SBE                 | NA            | major CHO metabolism | 0.91                     | 3        | 4       | 4           | 0.76          |
| TraesCS7A01G035600.1                        | Gamma-gliadin       | vacuole       | storage protein      | 0.85                     | 3        | 3       | 4           | 0.81          |
| TraesCS6D01G089200.1                        | Endoglucanase       | golgi         | misc                 | 0.82                     | 4        | 9       | 10          | 0.84          |
| TraesCS6D01G230000.1                        | SAM                 | cytosol       | AA synthesis         | 0.82                     | 3        | 13      | 16          | 0.85          |
| TraesCS1A01G033600.1                        | TIM17               | mitochondrion | protein targeting    | 0.8                      | 3        | 6       | 11          | 0.86          |
| TraesCS7D01G307500.1                        | UGE                 | golgi         | cell wall relative   | 0.78                     | 3        | 4       | 6           | 0.89          |
| TraesCS4A01G250800.1                        | ERO1                | golgi         | protein targeting    | 0.77                     | 3        | 11      | 13          | 0.9           |
| TraesCS7D01G031700.1                        | Gliadin-like avenin | vacuole       | storage protein      | 0.74                     | 6        | 14      | 32          | 0.94          |
| TraesCS4D01G252100.1                        | Beta-xylosidase     | golgi         | cell wall relative   | 0.73                     | 3        | 6       | 7           | 0.94          |
| TraesCS4A01G406200.1                        | ADH                 | cytosol       | fermentation         | 0.73                     | 3        | 9       | 9           | 0.95          |
| TraesCS5D01G135900.1                        | UTase               | NA            | AA metabolism        | 0.72                     | 3        | 4       | 5           | 0.97          |
| TraesCS4D01G250000.1                        | Alpha-AI            | golgi         | stress response      | 0.71                     | 3        | 12      | 16          | 0.98          |
| TraesCS1D01G001000.1                        | Gamma-gliadin       | NA            | storage protein      | 0.7                      | 5        | 5       | 6           | 0.99          |
| TraesCS5D01G004000.1                        | GSP                 | golgi         | storage protein      | 0.69                     | 3        | 4       | 6           | 1             |
| TraesCS7D01G364600.1                        | ABA receptor        | cytosol       | stress response      | 0.69                     | 3        | 4       | 4           | 1.01          |
| TraesCS5D01G210000.1                        | TPS                 | cytosol       | minor CHO metabolism | 0.68                     | 3        | 5       | 5           | 1.01          |
| TraesCS1A01G007400.1                        | Gamma-gliadin       | vacuole       | storage protein      | 0.68                     | 7        | 7       | 19          | 1.02          |
| TraesCS7D01G031800.1                        | Gliadin-like avenin | vacuole       | storage protein      | 0.67                     | 4        | 9       | 24          | 1.04          |

895 The first wheat genome Traes ID number of the protein group, short protein name, subcellular location (from cropPAL.org) and  
 896 functional category (MapMan) are included. The number of biological replicates (Brep No.), number of unique peptides (Pep No.)  
 897 and number of mass spectra hits (Spectra No.) for each protein are also shown.

898

899

900

901

902

903

904

905  
906

**Extended Data Table 2. The 20 wheat grain proteins with the highest ATP cost for biogenesis and maintenance during grain development.**

| Accession                                                        | Protein Name        | Location              | Functional Category  | ATP Cost ( $\mu\text{mol grain}^{-1} \text{d}^{-1}$ ) | ATP Cost (%) | Brep No. | Pep No. | Spectra No. |
|------------------------------------------------------------------|---------------------|-----------------------|----------------------|-------------------------------------------------------|--------------|----------|---------|-------------|
| <b>20 highest ATP cost proteins based on protein synthesis</b>   |                     |                       |                      |                                                       |              |          |         |             |
| TraesCS1A01G066100.1                                             | Globulin-11S        | vacuole               | storage protein      | 0.928                                                 | 1.663        | 6        | 27      | 49          |
| TraesCS1B01G013500.1                                             | LMW-GS              | vacuole               | storage protein      | 0.752                                                 | 1.348        | 5        | 7       | 13          |
| TraesCS7D01G031700.1                                             | Gliadin-like avenin | vacuole               | storage protein      | 0.546                                                 | 0.979        | 6        | 14      | 32          |
| TraesCS1D01G067100.1                                             | Globulin-11S        | vacuole               | storage protein      | 0.337                                                 | 0.604        | 5        | 13      | 25          |
| TraesCS5A01G554200.1                                             | Beta-amylase        | golgi                 | major CHO metabolism | 0.271                                                 | 0.485        | 6        | 14      | 21          |
| TraesCS2A01G168200.1                                             | Susy                | cytosol               | major CHO metabolism | 0.256                                                 | 0.46         | 9        | 144     | 358         |
| TraesCS1A01G007400.1                                             | Gamma-gliadin       | vacuole               | storage protein      | 0.227                                                 | 0.406        | 7        | 7       | 19          |
| TraesCSU01G032700.1                                              | Beta-amylase        | golgi                 | major CHO metabolism | 0.167                                                 | 0.3          | 8        | 44      | 92          |
| TraesCS4A01G296000.1                                             | Globulin 1          | vacuole               | storage protein      | 0.167                                                 | 0.299        | 4        | 6       | 8           |
| TraesCS1B01G449700.1                                             | AGPase              | plastid               | major CHO metabolism | 0.145                                                 | 0.259        | 7        | 73      | 121         |
| TraesCS4A01G214200.1                                             | PDI                 | endoplasmic reticulum | redox                | 0.119                                                 | 0.213        | 9        | 214     | 400         |
| TraesCS7B01G072000.1                                             | Alpah-AI            | extracellular         | stress response      | 0.119                                                 | 0.213        | 7        | 8       | 11          |
| TraesCS5D01G368900.1                                             | Serpin              | golgi                 | protein degradation  | 0.111                                                 | 0.199        | 3        | 14      | 20          |
| TraesCS1B01G330000.1                                             | HMW-GS              | vacuole               | storage protein      | 0.107                                                 | 0.192        | 7        | 21      | 32          |
| TraesCS4D01G192900.1                                             | GILT                | extracellular         | not assigned         | 0.102                                                 | 0.183        | 6        | 8       | 10          |
| TraesCS6A01G372500.1                                             | Aspartic proteinase | golgi                 | protein degradation  | 0.096                                                 | 0.172        | 5        | 9       | 12          |
| TraesCS7D01G284900.2                                             | AGPase              | plastid               | major CHO metabolism | 0.094                                                 | 0.168        | 4        | 4       | 5           |
| TraesCS1B01G102700.1                                             | Aminotransferase    | plastid               | AA synthesis         | 0.094                                                 | 0.168        | 9        | 114     | 175         |
| TraesCS7D01G535400.1                                             | SBE                 | plastid               | major CHO metabolism | 0.088                                                 | 0.158        | 4        | 11      | 11          |
| TraesCS7D01G031800.1                                             | Gliadin-like avenin | vacuole               | storage protein      | 0.079                                                 | 0.142        | 4        | 9       | 24          |
| <b>20 highest ATP cost proteins based on protein degradation</b> |                     |                       |                      |                                                       |              |          |         |             |
| TraesCS1B01G330000.1                                             | HMW-GS              | vacuole               | storage protein      | 0.0585                                                | 0.105        | 7        | 21      | 32          |
| TraesCS7D01G031800.1                                             | Gliadin-like avenin | vacuole               | storage protein      | 0.0433                                                | 0.078        | 4        | 9       | 24          |
| TraesCS1B01G449700.1                                             | AGPase              | plastid               | major CHO metabolism | 0.0244                                                | 0.044        | 7        | 73      | 121         |
| TraesCS5A01G554200.1                                             | Beta-amylase        | golgi                 | major CHO metabolism | 0.0242                                                | 0.043        | 6        | 14      | 21          |
| TraesCS1B01G013500.1                                             | LMW-GS              | vacuole               | storage protein      | 0.0236                                                | 0.042        | 5        | 7       | 13          |
| TraesCS1A01G007400.1                                             | Gamma-gliadin       | vacuole               | storage protein      | 0.0233                                                | 0.042        | 7        | 7       | 19          |
| TraesCS7D01G168000.1                                             | Alpah-AI            | extracellular         | stress response      | 0.0209                                                | 0.038        | 6        | 11      | 22          |
| TraesCS7D01G284900.2                                             | AGPase              | plastid               | major CHO metabolism | 0.0205                                                | 0.037        | 4        | 4       | 5           |
| TraesCS1B01G294300.1                                             | HSP70               | cytosol               | chaperone            | 0.017                                                 | 0.031        | 7        | 18      | 32          |
| TraesCS1A01G066100.1                                             | Globulin-11S        | vacuole               | storage protein      | 0.0167                                                | 0.03         | 6        | 27      | 49          |
| TraesCS7D01G031700.1                                             | Gliadin-like avenin | vacuole               | storage protein      | 0.0145                                                | 0.026        | 6        | 14      | 32          |
| TraesCS5D01G268000.1                                             | HSP90               | cytosol               | chaperone            | 0.0137                                                | 0.025        | 9        | 234     | 432         |
| TraesCS5D01G020100.1                                             | Enolase             | cytosol               | glycolysis           | 0.0113                                                | 0.02         | 9        | 14      | 28          |
| TraesCS2A01G385900.1                                             | VPE                 | vacuole               | protein degradation  | 0.0091                                                | 0.016        | 3        | 6       | 8           |
| TraesCS3B01G186100.1                                             | RBCL                | plastid               | photosynthesis       | 0.0091                                                | 0.016        | 7        | 10      | 17          |
| TraesCS4D01G267600.2                                             | CDC48-like          | cytosol               | cell function        | 0.0085                                                | 0.015        | 6        | 6       | 11          |
| TraesCS1B01G443100.1                                             | GTP-binding protein | cytosol               | signalling           | 0.0084                                                | 0.015        | 6        | 12      | 19          |
| TraesCS4D01G250000.1                                             | Alpha-AI            | golgi                 | stress response      | 0.0083                                                | 0.015        | 3        | 12      | 16          |
| TraesCS4A01G281500.1                                             | SND1                | cytosol               | RNA regulation       | 0.0077                                                | 0.014        | 9        | 66      | 93          |
| TraesCS7D01G454200.1                                             | Beta-Tubulin        | cytosol               | cell function        | 0.0076                                                | 0.014        | 9        | 121     | 260         |

907  
908  
909  
910  
911

The wheat genome first Traes ID of the protein group, short protein name, subcellular location (from cropPAL.org) and functional category (from MapMan) are included. The number of biological replicates (Brep No.), number of unique peptides (Pep No.) and number of mass spectra hits (Spectra No.) for each protein are also shown. ATP Cost (%) column shows the proportion of ATP energy cost to total ATP production ( $55.77 \mu\text{mol grain}^{-1} \text{d}^{-1}$ ) based on respiratory rate measurements.

912 **Extended Data Figures**

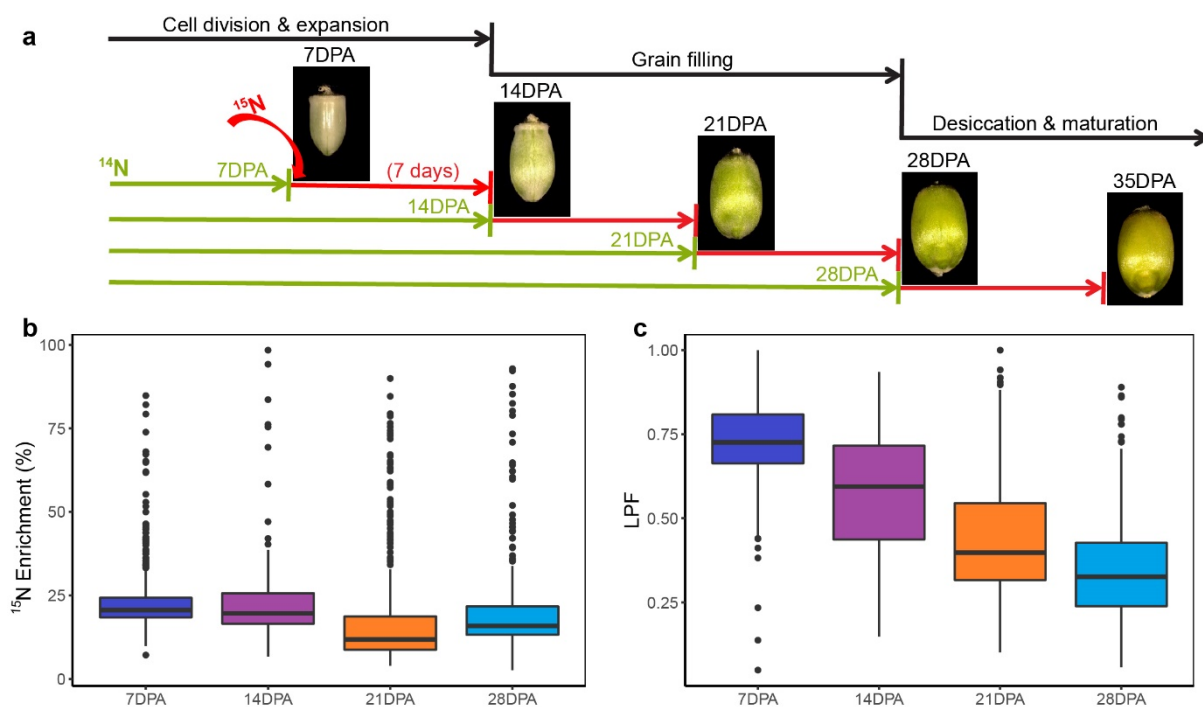

913

914 **Extended Data Fig. 1. | Optimisation of *in vivo* grain protein labelling approach during grain**  
915 **development. a,** The nitrogen stable-isotope  $^{15}\text{N}$  was used in this research and provided to plants as  
916 N-salts in hydroponic solutions. A fixed period of 7 days of continuous labelling was performed but  
917 was started at 7, 14, 21 or 28 days post anthesis (DPA), respectively. A representative grain image  
918 from each time point and a brief grain growth stage description is shown. **b,** The degree of nitrogen  
919 incorporation in the labelled peptides after 7 days of labelling at each growth stage is shown as  $^{15}\text{N}$   
920 enrichment level. **c,** The labelled protein fraction (LFP) showing the ratio of the abundance of  $^{15}\text{N}$   
921 labelled protein to total peptide abundance (natural abundance protein +  $^{15}\text{N}$ -labelled protein) after  
922 7 days of labelling at each growth stage.

923

924

925

926

927

928

929

930

931

932



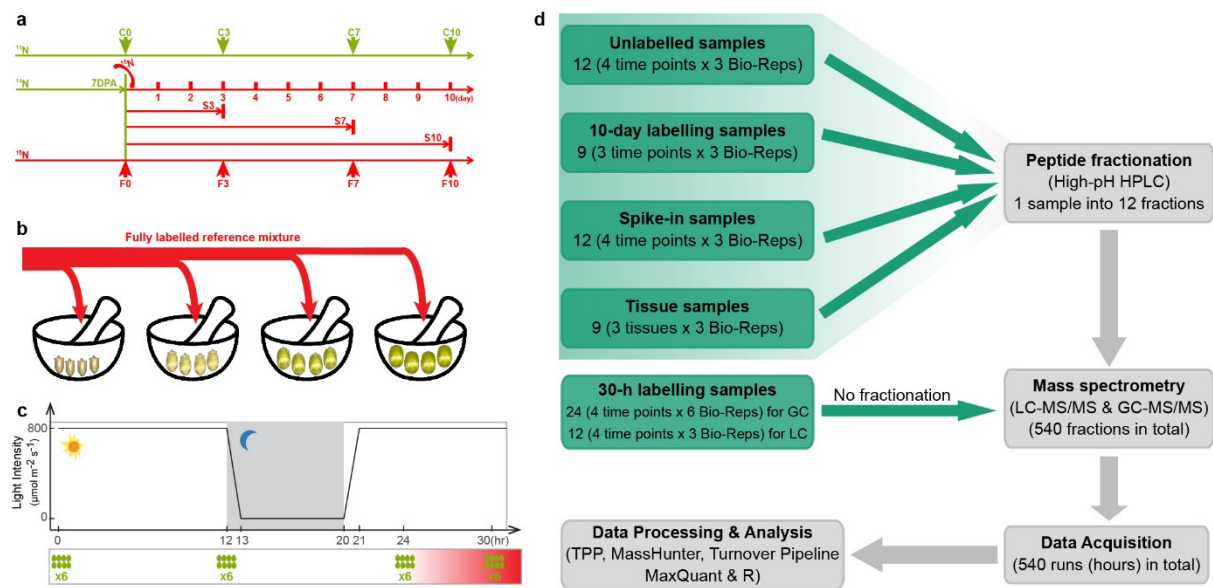

933

934 **Extended Data Fig. 2. | A flow diagram of experiment design, sample preparation, MS data**  
 935 **acquisition and analysis. a**, 10-day progressive labelling experiment for grain protein turnover rates  
 936 measurement. Labelling started at 7DPA, and samples were collected after 3 days (S3), 7 days (S7) and  
 937 10 days (S10) of <sup>15</sup>N labelling. The unlabelled samples (C0 to C10) and fully labelled samples (F0 to F10,  
 938 internal reference) at corresponding time points were also collected. Eight grains from the middle of  
 939 an ear were collected as a biological replicate, and in total three biological replicates were harvested.  
 940 **b**, A spike-in approach was developed to measure individual wheat grain protein FCP during grain  
 941 development. The same amount of a fully labelled reference mixture (100 mg in this study) was spiked  
 942 into four grains at each time point, where the reference mixture powder was prepared by pooling  
 943 together eight fully labelled grains of each time point. **c**, 30-h progressive labelling experiment for lag  
 944 time estimation. Using 7DPA plants, samples were collected at 0, 12, 24, 30 hours after labelling, and  
 945 8 grains from the middle of an ear were collected as a biological replicate and six biological replicates  
 946 were collected. **d**, a flow diagram of sample preparation, mass spectrometry data acquisition and  
 947 afterward data analysis. The 12 30-h progressive labelling samples were used for metabolite  
 948 measurements by GC-MS/MS and peptide measurements by LC-MS/MS.

949

950

951

952

953

954

955

956

957

958

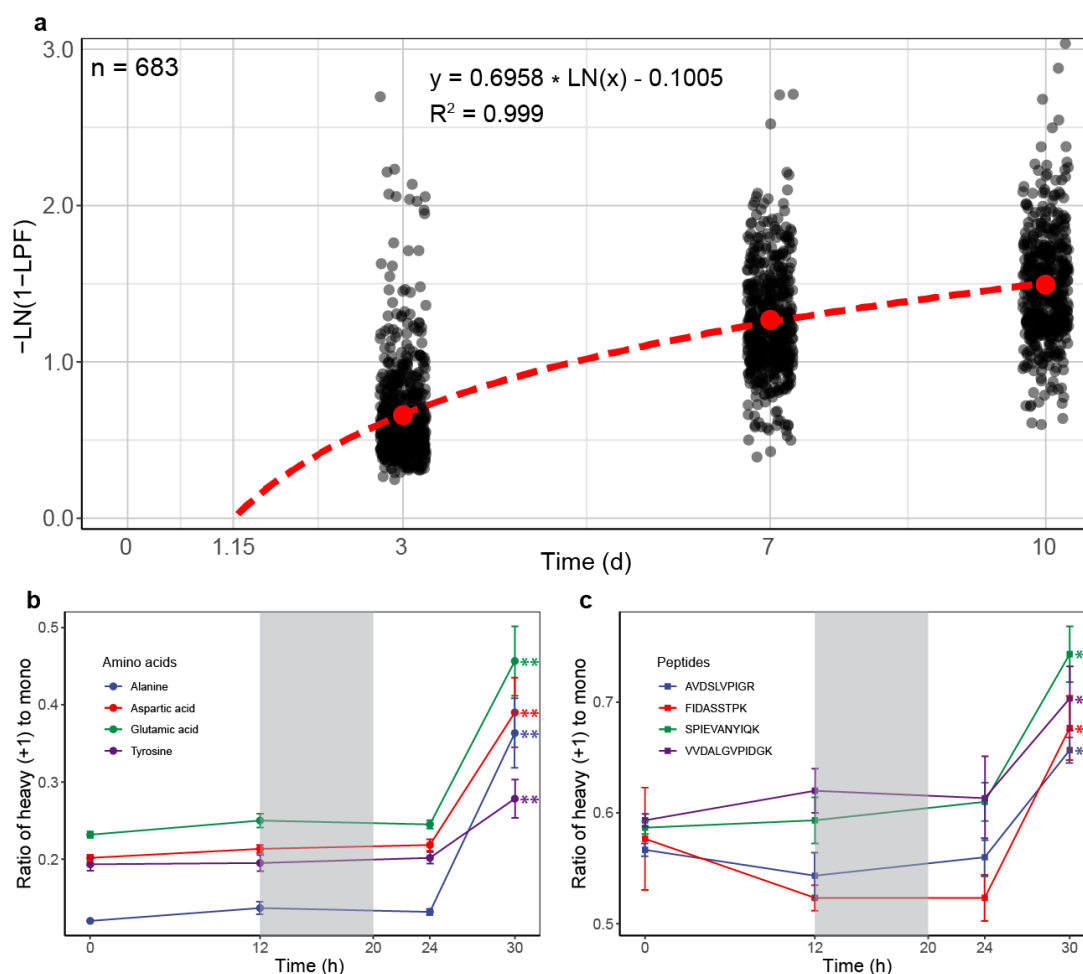

959

960 **Extended Data Fig. 3. | The time lag of label incorporation into wheat grain proteins. a,** The  
 961 estimation of lag time of incorporation into proteins via logarithmic regression of the inverse of the  
 962 natural log of natural abundance protein (1-LPF). The dashed red line demonstrated the logarithmic  
 963 regression model using the mean value (red dots) of each time point. The formula of the logarithmic  
 964 regression model and its R-square are shown on the top of the scatter plot. **b,** The ratio of heavy (+1)  
 965 to mono abundance over the time course of 4 example amino acids measured by GC-MS. Six biological  
 966 replicates were conducted. **c,** The ratio of heavy (+1) to mono abundance over time course of 4  
 967 example peptides measured by LC-MS/MS. Three biological replicates, three of the six used for the GC  
 968 analysis, were conducted. The shade area represents night time. One-way ANOVA p-value < 0.01  
 969 (asterisks). Actual mass spectrum peaks of the representative amino acid and peptide are shown in  
 970 Extended Data Fig. 4. Detailed data and statistical test results involved in this analysis are listed in  
 971 Supplementary Data 2.

972

973

974

975

976

977

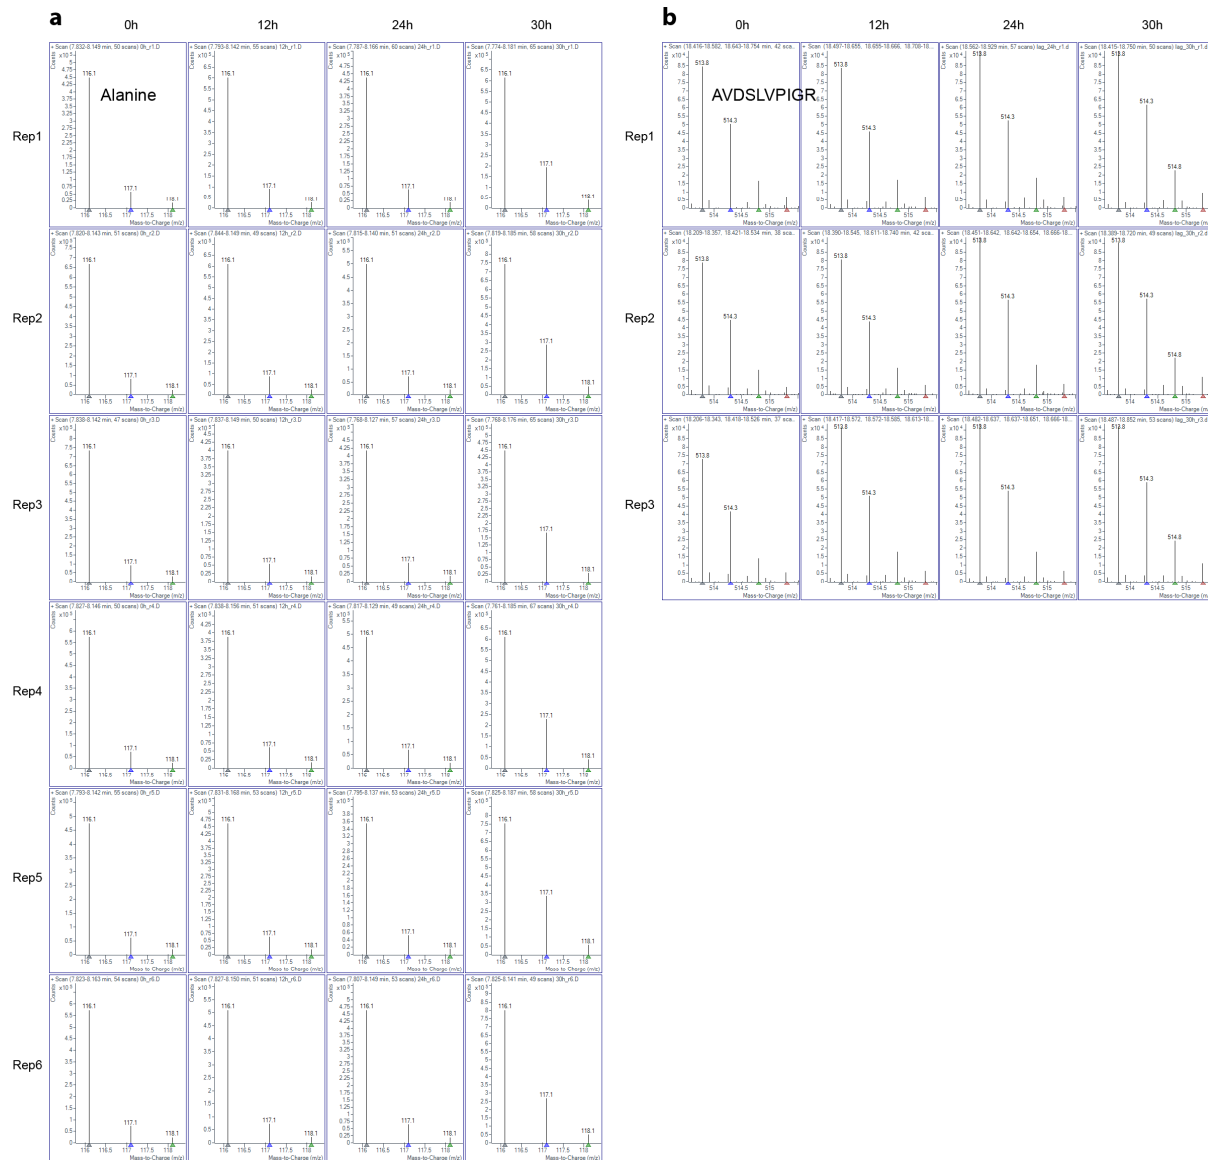

978

979 **Extended Data Fig. 4. | Mass spectrum of the change from mono to mono + labelled abundances of**  
 980 **amino acids and peptides over a 30-h time course to estimate labelling lag time. a, Example mass**  
 981 **spectrum peaks of mono and mono + labelled abundance of alanine over the 30h time course.**  
 982 **Unlabelled m/z: 161.1; +1 m/z: 177.1. b, Mass spectrum peaks of mono and mono + labelled**  
 983 **abundance of the representative peptide (AVDSLVIPIGR) over the 30h time course. Unlabelled m/z:**  
 984 **513.8; +1 m/z: 514.3, +2 m/z: 514.8 and +3 m/z: 515.3.**

985

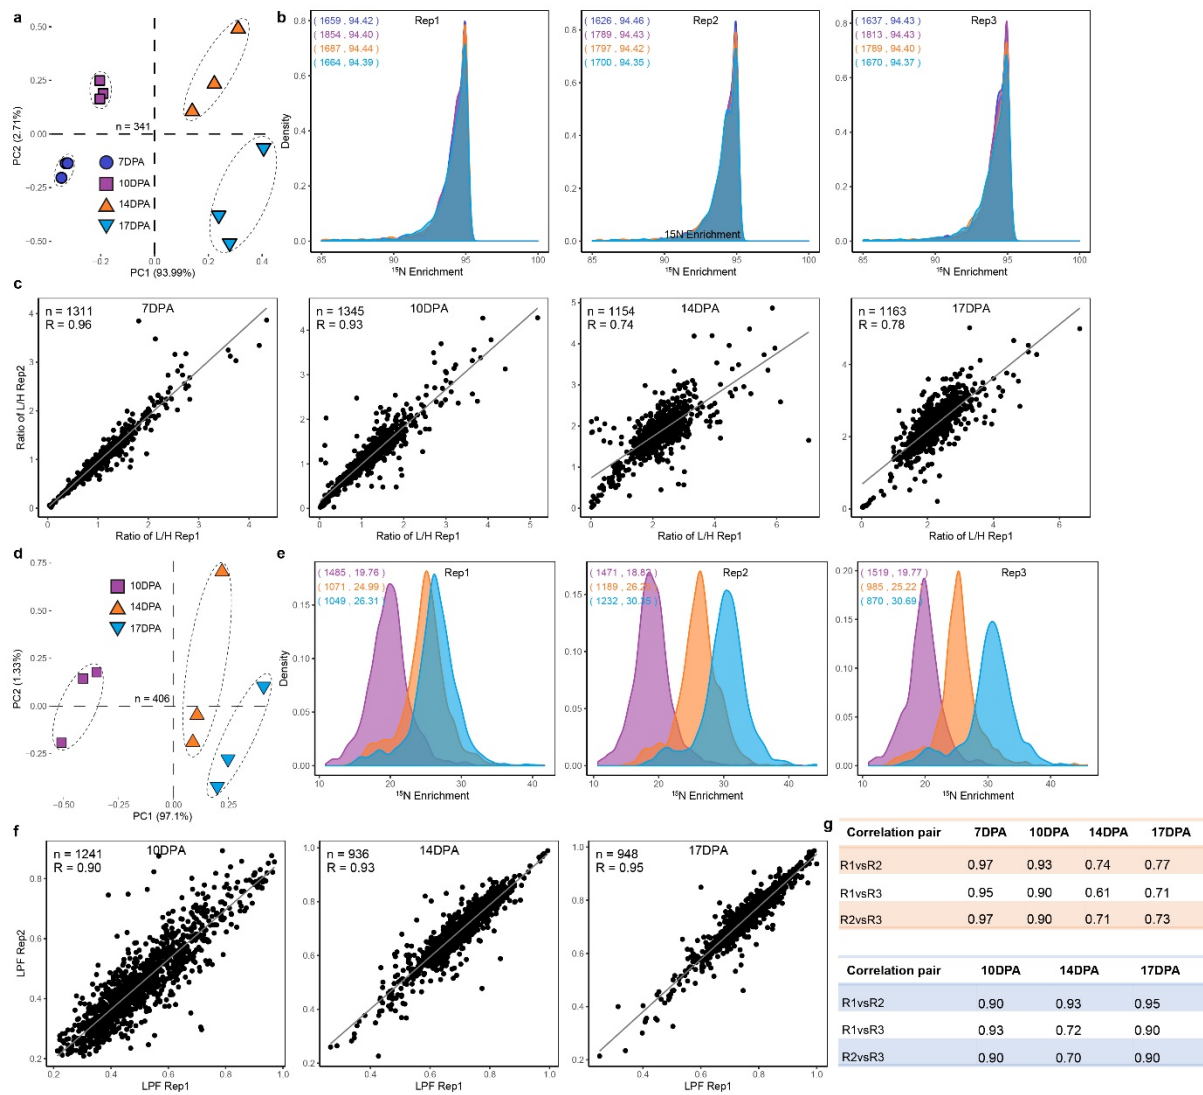

986

987 **Extended Data Fig. 5. | Data quality verification of spike-in and progressive labelling data.** A series  
 988 of data quality verifications were conducted before further downstream data analysis. The raw data  
 989 used for this analysis are provided in Supplementary Data 3. The high quality of raw data was  
 990 supported by three factors, namely the high correlation coefficient (0.84 average) between biological  
 991 replicates; clear separation of different time point samples in PCA; and consistent nitrogen  
 992 incorporation ( $^{15}\text{N}$  enrichment) between biological replicates at a timepoint. **a**, Principal component  
 993 analysis of spike-in data. The dashed circles outline biological replicates for each time point. **b**, The  $^{15}\text{N}$   
 994 enrichment level of spike-in data of each time point shown in overlapped density plots. The number  
 995 of proteins and median of  $^{15}\text{N}$  enrichment of each time point are shown within brackets (7DPA: indigo;  
 996 10DPA: purple; 14DPA: orange; 17DPA: turquoise). **c**, Representative scatter plot showing Pearson  
 997 correlation coefficient between biological replicate 1 and 2 of spike-in data in light to heavy ratio at  
 998 each time point. The solid grey line indicates the linear regression model. Data size in number of  
 999 proteins and the correlation coefficient shown on the top-left corner of the plot. Correlation  
 1000 coefficient of all possible pairs are shown in the upper panel in **g**. **d**, **e** and **f** showing data verification  
 1001 result of progressive labelling data using the same analysis strategies as in A, B and C respectively. **G**,  
 1002 The Pearson correlation coefficient of all possible pairs of spike-in (upper panel) and progressive  
 1003 labelling data (lower panel).

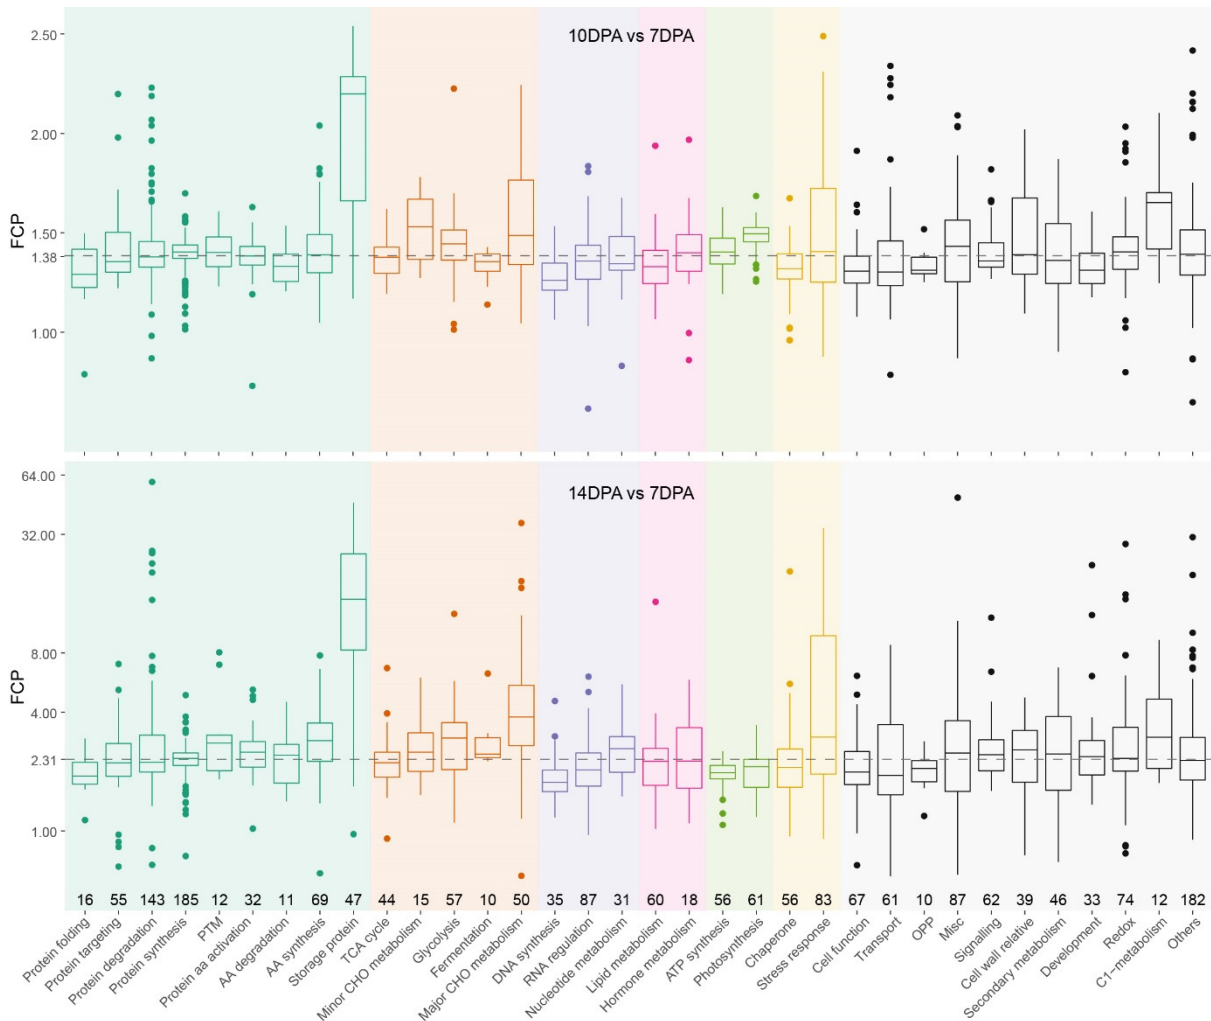

1004

1005 **Extended Data Fig. 6. | The individual FCP of wheat grain proteins at DPA 10 and DPA 14 summarized**  
 1006 **by their functional categories.** 34 categories ( $\geq 10$  proteins) were displayed, and the rest of the  
 1007 categories ( $< 10$  proteins) were grouped into 'Others'. The number of proteins for each functional  
 1008 category (MapMan bin) is displayed along with x-axis, and boxes within each superior category are  
 1009 sorted by increasing order of median FCP. The y-axis is log2 transformed, and the dashed line shows  
 1010 the overall median FCP. Pairwise t-test results between categories are listed on Supplementary Data  
 1011 4b. Colours represent to broad categories: Amino acid metabolism (Green), Carbohydrate metabolism  
 1012 (Orange-red), Nucleotide metabolism (Purple), Lipid metabolism (Pink), Energy producing  
 1013 (Lawngreen), Stress response (Gold) and 'Other' categories (Black).

1014

1015

1016

1017

1018

1019

1020

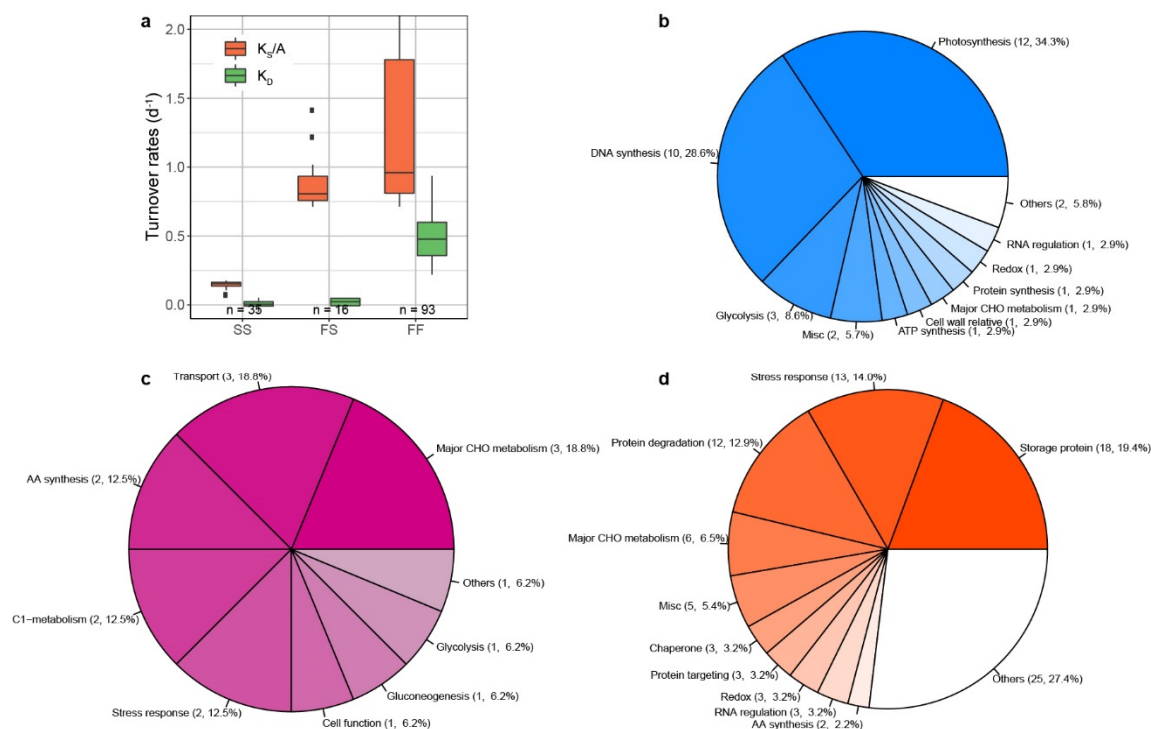

1021

1022 **Extended Data Fig. 7. | Relatively slow and fast turning over wheat grain proteins during grain**  
 1023 **development.** A total of 678 proteins, defined as relatively fast or slow turning over proteins, were  
 1024 identified within the dataset (Supplementary Data 5b). These proteins were further grouped into  
 1025 three categories according to their turnover characteristics, house-keeping proteins (SS: having both  
 1026 relatively slow  $K_S/A$  and  $K_D$  rates), induced but stable proteins (FS: having relatively fast  $K_S/A$  but  
 1027 relatively slow  $K_D$ ) and rapidly-cycling proteins (FF: having both relative fast  $K_S/A$  and  $K_D$  rates). **a**, Box  
 1028 plots of the averaged  $K_S/A$  and  $K_D$  rates calculated over three time points for the SS, FS and FF  
 1029 categories. The number of proteins in each category are shown along with x-axis. Statistical results  
 1030 derived from one-way ANOVA and Tukey's HSD were shown in Supplementary Data 5c. **b**, Pie plot of  
 1031 functional categories of house-keeping proteins (SS). **c**, Pie plot of functional categories of induced but  
 1032 stable proteins (FS). **d**, Pie plot of functional categories of rapidly-cycling (FF). Only top 10 categories  
 1033 are shown if total functional categories  $\geq 10$ , and the rest of categories are assigned into Others.

1034

1035

1036

1037

1038

1039

1040

1041

1042

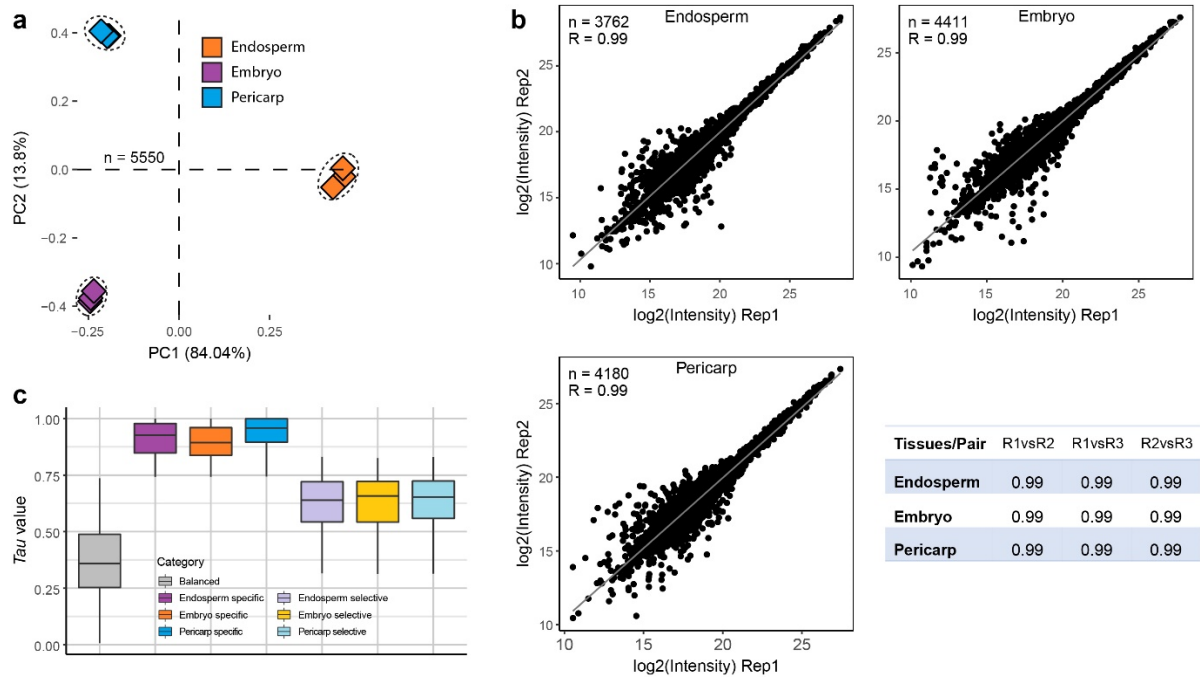

1043

1044 **Extended Data Fig. 8. | Data quality verification of wheat grain tissue data sets.** **a**, Principal  
 1045 component analysis of 5550 protein abundances used for this analysis (Supplementary Data 6).  
 1046 Dashed circles encompass three biological replicates for each time point. **b**, Representative scatter  
 1047 plots showing Pearson correlation coefficient between biological replicate 1 and 2 of log<sub>2</sub> transformed  
 1048 protein abundance intensity for each tissue. The solid grey line shows the linear regression model. The  
 1049 number of proteins identified and the correlation coefficient between replicates is shown on the top-  
 1050 left corner of the plot. The table shows correlation coefficients of all possible pairs. **c**, The box plot of  
 1051 *Tau* value for the seven protein expression categories.

1052

1053

1054

1055

1056

1057

1058

1059

1060

1061

1062

1063

1064

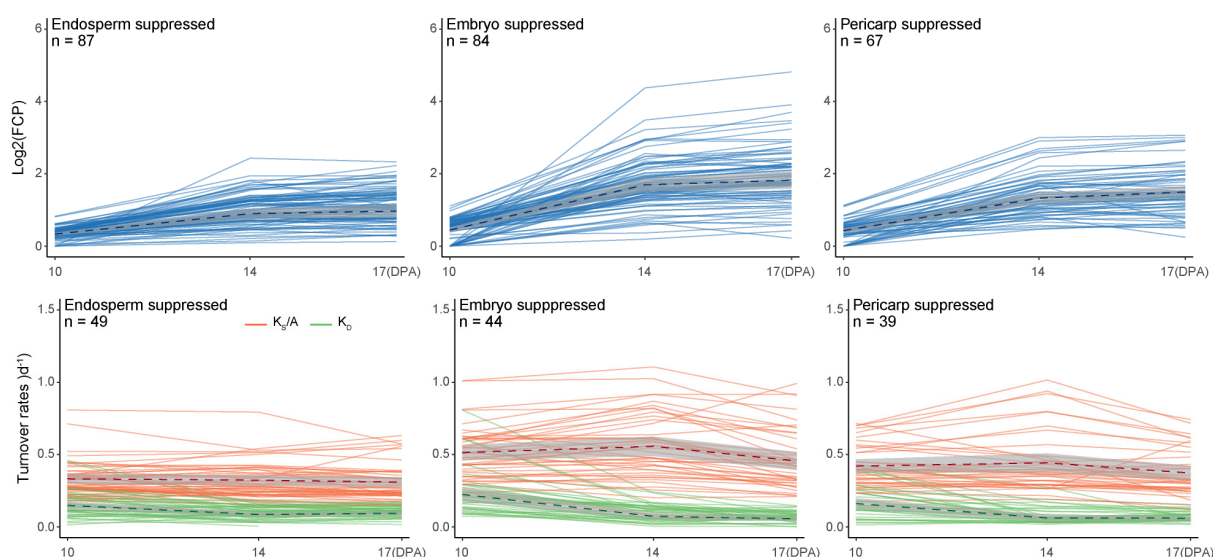

1065

1066 **Extended Data Fig. 9. | Changes in FCP and turnover rate profiles of proteins present in a lower**  
1067 **abundance in a given tissue type during grain development.** Only proteins having values (FCP or  
1068 turnover rates) at all three time points are included in the analysis. The dashed lines demonstrate the  
1069 mean values, and the grey shade areas show the 95% confidence intervals.

1070

1071

1072

1073

1074

1075

1076

1077

1078

1079

1080

1081



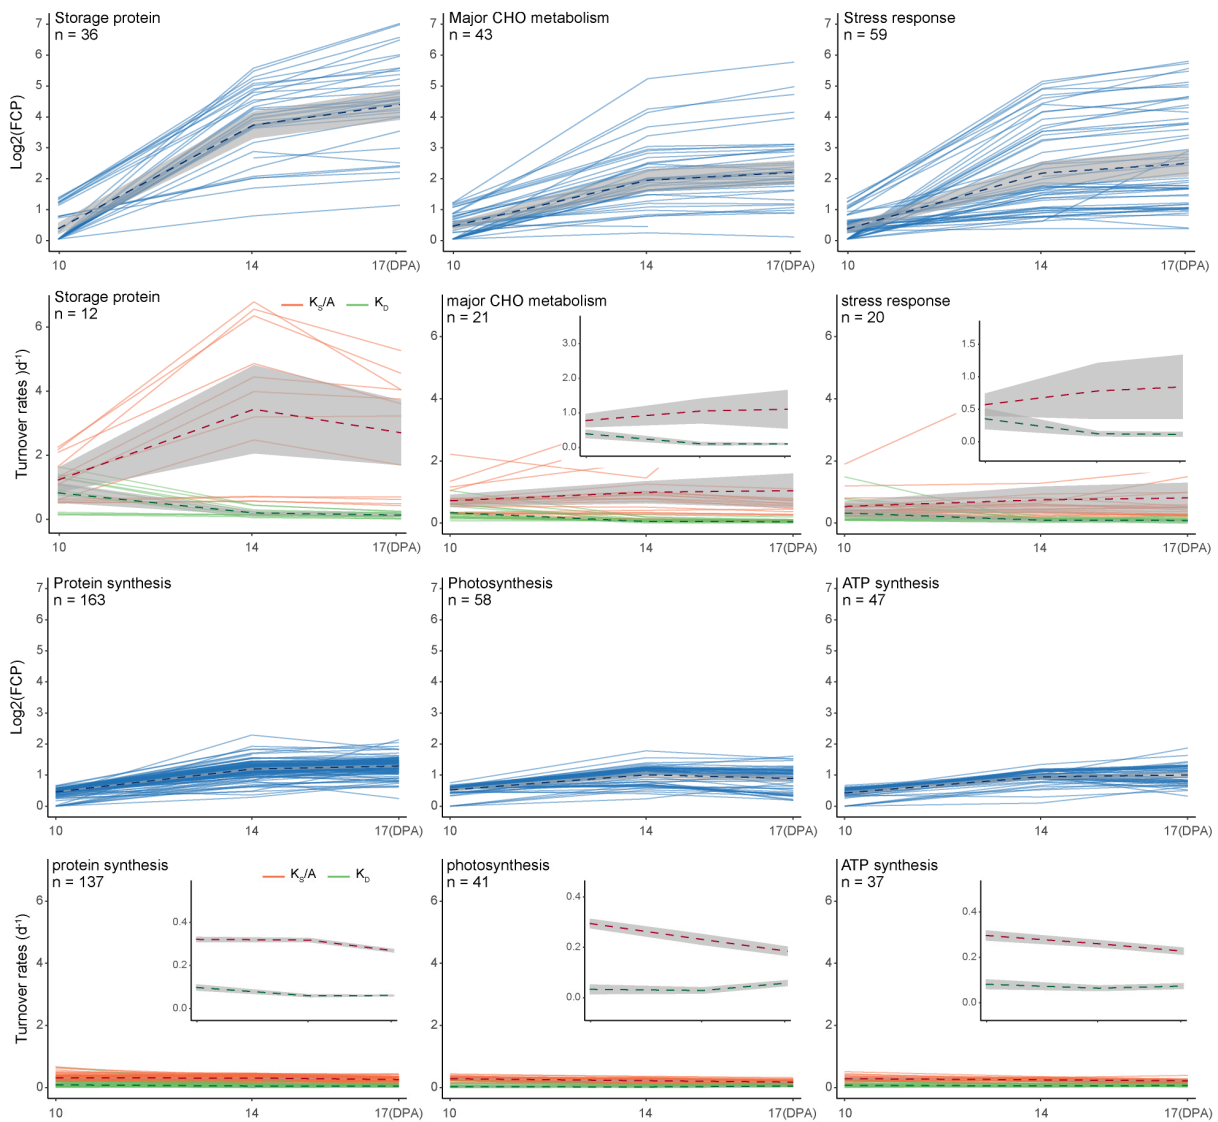

1082

1083 **Extended Data Fig. 10. | Changes in turnover rates of proteins with high (top 6 graphs) and low**  
 1084 **(bottom 6 graphs) FCP during grain development.** Each pattern includes three example functional  
 1085 categories. FCP (Blue), protein synthesis  $K_A/S$  (Orange) and protein degradation  $K_D$  (Green) values are  
 1086 shown. In each functional category, only proteins with FCP or turnover rates measured at all three  
 1087 time points are included. The number of proteins included in each functional category is shown.  
 1088 Dashed lines indicate the mean values, and the grey shade areas show the 95% confidence intervals.  
 1089 The optimized y-axis scale version of turnover rates data are inserted to highlight the change pattern.

1090

1091

1092

1093

1094

1095

1096

1097 **Supplementary information**

1098

1099 **Supplementary Data 1**

1100 Full data list of grain fresh weight, grain respiration rate and total grain ATP production.

1101 **Supplementary Data 2**

1102 Full data list of lag time modelling, GC-MS/MS data and LC-MS/MS data.

1103 **Supplementary Data 3**

1104 Full data list used for data quality control analysis.

1105 **Supplementary Data 4**

1106 Full data list of wheat grain individual FCP values during grain development.

1107 **Supplementary Data 5**

1108 Full data list of wheat grain protein turnover rates during grain development.

1109 **Supplementary Data 6**

1110 Full data list of protein relative abundance for embryo, endosperm and pericarp proteomes.

1111 **Supplementary Data 7**

1112 Full data list of ATP energy budget used for wheat grain protein turnover during grain development.

1113 **Supplementary Data 8**

1114 Full data list of wheat grain key storage proteins accumulation profiles during grain development.

1115
